# Supplementary material for: Genetically Predicted Type 2 Diabetes Mellitus Liability, Glycated Hemoglobin and Cardiovascular Diseases: A Wide-Angled Mendelian Randomization Study
Source: MDPI journal article supplement (doi:10.3390/genes12101644), 2021-10-19
Supplement: s1 [file s1]

## **SUPPLEMENTARY MATERIALS**

(a)

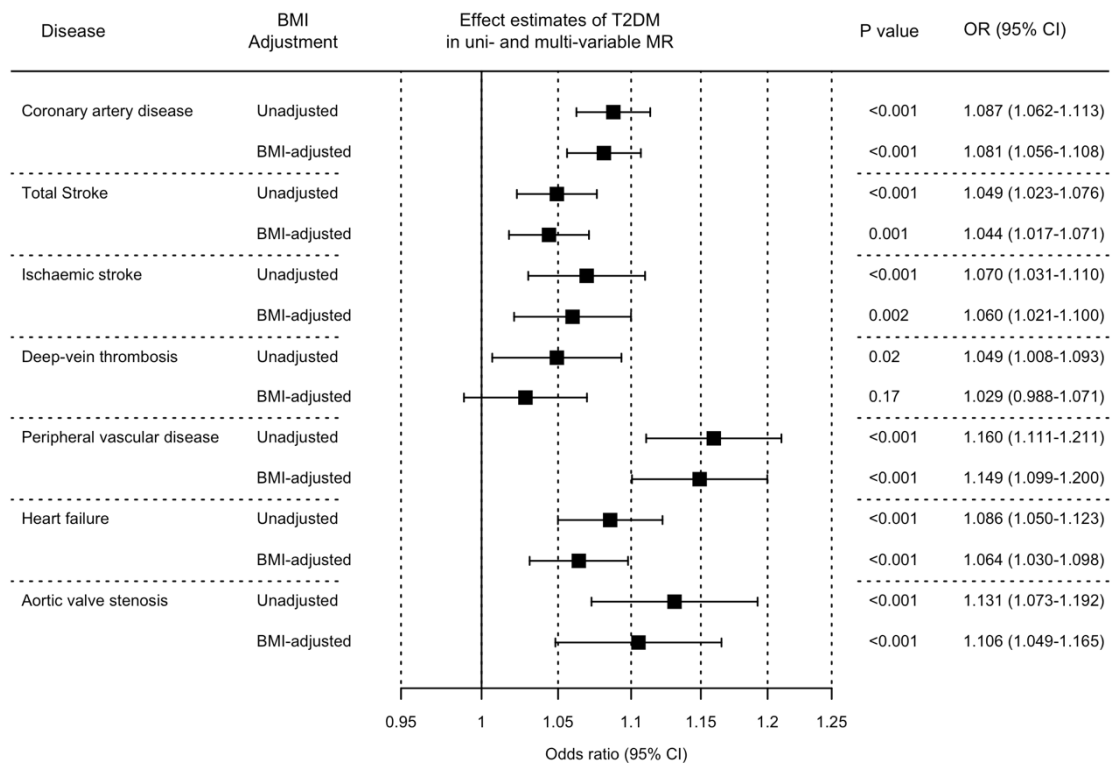

(b)

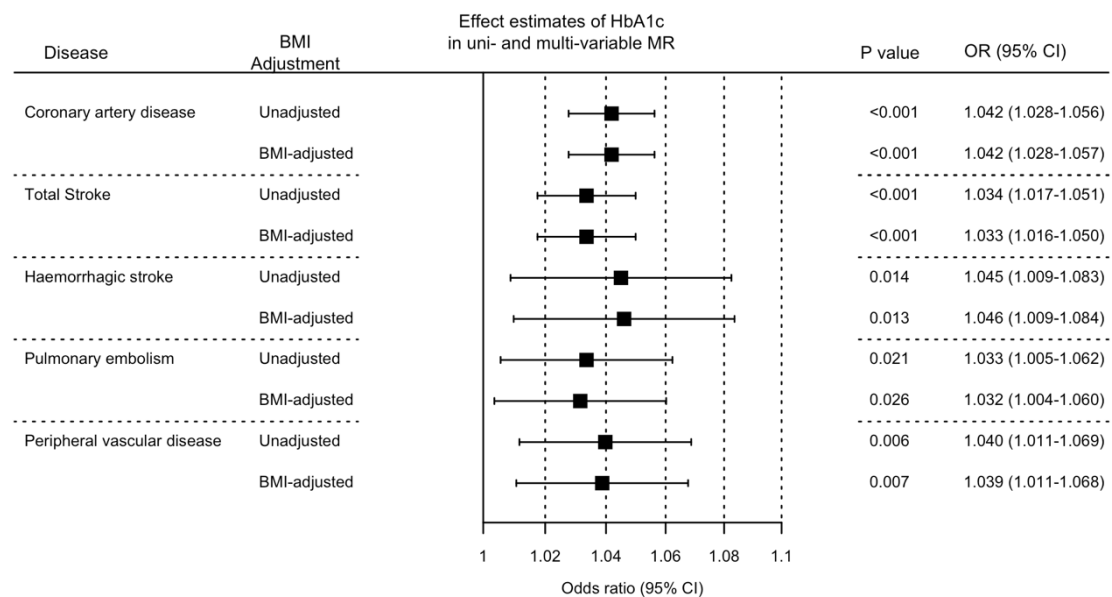

**Supplementary Figure S1. Comparison between Mendelian randomization estimates of type 2 diabetes (panel a) mellitus and HbA1c (panel b) on CVD outcomes before and after the adjustment for body mass index (BMI).**

Outcomes were selected for being associated with T2DM or HbA1c with a significant or suggestively significant p-value in the primary MR analyses. Multivariable MR analyses were performed to estimate the impacts of T2DM and HbA1c with adjustment for BMI. The corresponding unadjusted estimates were from univariable MR analyses using the same sets of genetic variant

**Table S1. Summary of case numbers and definitions of included cardiovascular outcomes based on classification codes in UK Biobank.**

| Disease name                | Number of cases* | Health conditions from electronic health records |                                                                      |                                                                                    | Self-reported health conditions               |                                      |                                                                        |                                                                |
|-----------------------------|------------------|--------------------------------------------------|----------------------------------------------------------------------|------------------------------------------------------------------------------------|-----------------------------------------------|--------------------------------------|------------------------------------------------------------------------|----------------------------------------------------------------|
|                             |                  | ICD-9 Diagnosis                                  | ICD-10 Diagnosis                                                     | Operative procedures (OPCS4)                                                       | Self-reported non-cancer illness code (20002) | Self-reported operation code (20004) | Code of vascular and bronchiolar conditions diagnosed by doctor (6152) | Code of vascular and heart problems diagnosed by doctor (6150) |
| Coronary artery disease     | 29278            | 410.X, 411.X, 412.X, 414.0, 414.8, 414.9         | I21.X, I22.X, I23.X, I24.X, I25.1, I25.2, I25.5, I25.6, I25.8, I25.9 | K40.X, K41.X, K42.X, K43.X, K44.X, K45.X, K46.X, K49.X, K50.1, K50.2, K50.4, K75.X | 1075                                          | 1070, 1095, 1523                     |                                                                        | 1                                                              |
| Stroke (All)                | 9652             | 430.X, 431.X, 433.X, 434.X                       | I60.X, I61.X, I63.X                                                  |                                                                                    | 1081, 1086, 1491, 1583                        |                                      |                                                                        |                                                                |
| Ischemic stroke             | 4602             | 433.X, 434.X                                     | I63.X                                                                |                                                                                    | 1081, 1583                                    |                                      |                                                                        |                                                                |
| Haemorrhagic stroke         | 1981             | 430.X, 431.X                                     | I60.X, I61.X                                                         |                                                                                    | 1491, 1086                                    |                                      |                                                                        |                                                                |
| Abdominal aortic aneurysm   | 1094             | 441.3, 441.4                                     | I71.3, I71.4                                                         | L19.4, L19.5                                                                       |                                               |                                      |                                                                        |                                                                |
| Thoracic aortic aneurysm    | 347              | 441.1, 441.2                                     | I71.1, I71.2                                                         |                                                                                    |                                               |                                      |                                                                        |                                                                |
| Deep-vein thrombosis        | 9454             | 451.1                                            | I80.2                                                                | L90.2                                                                              | 1094                                          |                                      | 7                                                                      |                                                                |
| Pulmonary embolism          | 6148             | 415.1                                            | I26.X                                                                |                                                                                    | 1093                                          |                                      | 5                                                                      |                                                                |
| Peripheral vascular disease | 3415             | 443.8, 443.9                                     | I73.8, I73.9                                                         |                                                                                    | 1067                                          |                                      |                                                                        |                                                                |

| Disease name        | Number of cases* | Health conditions from electronic health records                              |                            |                              | Self-reported health conditions               |                                      |                                                                        |                                                                |
|---------------------|------------------|-------------------------------------------------------------------------------|----------------------------|------------------------------|-----------------------------------------------|--------------------------------------|------------------------------------------------------------------------|----------------------------------------------------------------|
|                     |                  | ICD-9 Diagnosis                                                               | ICD-10 Diagnosis           | Operative procedures (OPCS4) | Self-reported non-cancer illness code (20002) | Self-reported operation code (20004) | Code of vascular and bronchiolar conditions diagnosed by doctor (6152) | Code of vascular and heart problems diagnosed by doctor (6150) |
| Heart failure       | 6712             | 402.01, 402.11, 402.91, 404.01, 404.11, 404.91, 404.03, 404.13, 404.93, 428.X | I11.0, I13.0, I13.2, I50.X |                              | 1076, 1079, 1588                              |                                      |                                                                        |                                                                |
| Atrial fibrillation | 16945            | 427.3                                                                         | I48                        |                              | 1471                                          |                                      |                                                                        |                                                                |
| Aortic stenosis     | 2244             |                                                                               | I35.0, I35.2               |                              | 1490                                          |                                      |                                                                        |                                                                |

Abbreviations: ICD: International Classification of Disease; OPCS4: Office of Population Censuses and Surveys Classification of Interventions and Procedures version 4.

\*Include cases at baseline and during follow-up.

**Table S2. Statistical power of the present study to detect a true odds ratio of 1.01, 1.02, 1.05 and 1.1 associated with 1mmol/mol-increment of HbA1c.**

| Disease                     | Cases (N) | Proportion of cases in the sample | Power (%) to detect a causal of 1mmol/mol increase in HbA1C: |           |           |          |
|-----------------------------|-----------|-----------------------------------|--------------------------------------------------------------|-----------|-----------|----------|
|                             |           |                                   | OR = 1.01                                                    | OR = 1.02 | OR = 1.05 | OR = 1.1 |
| Coronary artery disease     | 29278     | 7.96%                             | 31.4%                                                        | 83.6%     | 100.0%    | 100.0%   |
| Stroke (all)                | 9652      | 2.62%                             | 13.8%                                                        | 41.1%     | 99.0%     | 100.0%   |
| Haemorrhagic stroke         | 1981      | 0.54%                             | 5.9%                                                         | 12.2%     | 49.9%     | 96.9%    |
| Ischemic stroke             | 4602      | 1.25%                             | 8.8%                                                         | 22.6%     | 84.4%     | 100.0%   |
| Abdominal aortic aneurysm   | 1094      | 0.30%                             | 4.8%                                                         | 8.6%      | 30.7%     | 81.2%    |
| Thoracic aortic aneurysm*   | 347       | 0.09%                             | 3.7%                                                         | 5.2%      | 12.7%     | 36.1%    |
| Deep-vein thrombosis        | 9454      | 2.57%                             | 13.6%                                                        | 40.4%     | 98.8%     | 100.0%   |
| Pulmonary embolism          | 6148      | 1.67%                             | 10.4%                                                        | 28.5%     | 92.9%     | 100.0%   |
| Peripheral vascular disease | 3415      | 0.93%                             | 7.5%                                                         | 17.9%     | 72.7%     | 99.9%    |
| Heart failure               | 6712      | 1.83%                             | 10.9%                                                        | 30.6%     | 94.7%     | 100.0%   |
| Atrial fibrillation         | 16945     | 4.61%                             | 20.7%                                                        | 62.4%     | 100.0%    | 100.0%   |
| Aortic valve stenosis       | 2244      | 0.61%                             | 6.2%                                                         | 13.2%     | 54.9%     | 98.3%    |

\*The outcome was underpowered (power < 80%) to detect any causal effect of 1mmol/mol increase in HbA1c with a size of OR≤1.1.

**Table S3. Mendelian randomization estimates and 95% confidence intervals for cardiovascular outcomes per 2-fold increase in genetically predicted risk of type 2 diabetes mellitus.** Analyses were performed in 367,703 UK Biobank participants of European ancestries, as well as in those without diabetes, and without diabetes or pre-diabetes.

| Disease                     | All participants    |         | With diabetics excluded |         | With diabetics and pre-diabetics excluded |         |
|-----------------------------|---------------------|---------|-------------------------|---------|-------------------------------------------|---------|
|                             | Odds Ratio (95% CI) | P-value | Odds Ratio (95% CI)     | P-value | Odds Ratio (95% CI)                       | P-value |
| Coronary artery disease     | 1.087 (1.062-1.113) | <0.001  | 1.021 (0.996-1.047)     | 0.098   | 1.012 (0.985-1.040)                       | 0.378   |
| Stroke (All)                | 1.049 (1.023-1.076) | <0.001  | 1.000 (0.973-1.027)     | 0.998   | 1.007 (0.977-1.038)                       | 0.646   |
| Ischaemic stroke            | 1.072 (1.033-1.112) | <0.001  | 1.006 (0.965-1.049)     | 0.77    | 1.007 (0.960-1.056)                       | 0.768   |
| Haemorrhagic stroke         | 1.005 (0.951-1.063) | 0.861   | 0.997 (0.940-1.057)     | 0.908   | 1.015 (0.951-1.084)                       | 0.648   |
| Abdominal aortic aneurysm   | 0.982 (0.906-1.065) | 0.668   | 0.979 (0.901-1.063)     | 0.608   | 0.976 (0.886-1.074)                       | 0.612   |
| Thoracic aortic aneurysm    | 0.973 (0.859-1.102) | 0.668   | 1.010 (0.883-1.156)     | 0.882   | 1.011 (0.873-1.172)                       | 0.88    |
| Deep-vein thrombosis        | 1.050 (1.008-1.093) | 0.018   | 1.028 (0.986-1.073)     | 0.198   | 1.032 (0.988-1.077)                       | 0.159   |
| Pulmonary embolism          | 1.013 (0.969-1.059) | 0.564   | 1.003 (0.957-1.052)     | 0.886   | 1.008 (0.958-1.061)                       | 0.75    |
| Peripheral vascular disease | 1.161 (1.112-1.212) | <0.001  | 1.047 (0.997-1.101)     | 0.067   | 1.041 (0.982-1.104)                       | 0.174   |
| Heart failure               | 1.087 (1.051-1.123) | <0.001  | 1.011 (0.973-1.051)     | 0.561   | 1.009 (0.967-1.052)                       | 0.686   |
| Atrial fibrillation         | 1.014 (0.989-1.040) | 0.284   | 0.989 (0.963-1.017)     | 0.438   | 0.989 (0.961-1.018)                       | 0.463   |
| Aortic valve stenosis       | 1.133 (1.075-1.194) | <0.001  | 1.083 (1.023-1.146)     | 0.006   | 1.056 (0.990-1.127)                       | 0.098   |

**Table S4. Mendelian randomization estimates for cardiovascular outcomes per 2-fold increase in genetically predicted risk of type 2 diabetes mellitus in sensitivity analyses.** Analyses were performed in 367,703 UK Biobank participants of European ancestries, using weighted median method and MR-Egger method.

| Disease                     | Weighted median        |             | MR-Egger               |             |                 |             |
|-----------------------------|------------------------|-------------|------------------------|-------------|-----------------|-------------|
|                             | Odds Ratio<br>(95% CI) | P-<br>value | Odds Ratio<br>(95% CI) | P-<br>value | Y-<br>intercept | P-<br>value |
| Coronary artery diseases    | 1.058 (1.026-1.092)    | <0.001      | 1.016 (0.969-1.066)    | 0.505       | 0.007           | 0.002       |
| Stroke (All)                | 1.044 (0.995-1.096)    | 0.081       | 1.028 (0.975-1.084)    | 0.304       | 0.002           | 0.394       |
| Ischaemic stroke            | 1.055 (0.985-1.131)    | 0.124       | 1.053 (0.975-1.137)    | 0.188       | 0.002           | 0.606       |
| Haemorrhagic stroke         | 0.936 (0.847-1.034)    | 0.192       | 0.930 (0.827-1.046)    | 0.228       | 0.008           | 0.143       |
| Abdominal aortic aneurysm   | 0.887 (0.772-1.019)    | 0.089       | 0.887 (0.749-1.051)    | 0.168       | 0.011           | 0.182       |
| Thoracic aortic aneurysm    | 0.938 (0.731-1.204)    | 0.614       | 0.926 (0.714-1.201)    | 0.563       | 0.005           | 0.671       |
| Deep-vein thrombosis        | 1.021 (0.981-1.063)    | 0.299       | 0.985 (0.907-1.071)    | 0.731       | 0.007           | 0.09        |
| Pulmonary embolism          | 0.990 (0.935-1.049)    | 0.738       | 0.963 (0.878-1.057)    | 0.432       | 0.005           | 0.226       |
| Peripheral vascular disease | 1.125 (1.039-1.219)    | 0.004       | 1.133 (1.036-1.239)    | 0.006       | 0.003           | 0.545       |
| Heart failure               | 1.034 (0.986-1.084)    | 0.164       | 1.006 (0.939-1.077)    | 0.867       | 0.008           | 0.012       |
| Atrial fibrillation         | 0.993 (0.958-1.029)    | 0.696       | 0.985 (0.935-1.038)    | 0.576       | 0.003           | 0.218       |
| Aortic valve stenosis       | 1.080 (0.990-1.178)    | 0.083       | 1.046 (0.938-1.166)    | 0.422       | 0.008           | 0.1         |

**Table S5. Cochran's Q statistics and p-values of heterogeneity test for Mendelian randomization estimates of type 2 diabetes mellitus on cardiovascular outcomes.**

| Disease                     | Entire Population |         | With diabetics excluded |         | With diabetics and pre-diabetics excluded |         |
|-----------------------------|-------------------|---------|-------------------------|---------|-------------------------------------------|---------|
|                             | Cochran's Q       | P-value | Cochran's Q             | P-value | Cochran's Q                               | P-value |
| Coronary artery disease     | 638.862           | <0.001  | 586.273                 | <0.001  | 524.663                                   | <0.001  |
| Stroke (All)                | 270.487           | 0.101   | 251.765                 | 0.32    | 246.525                                   | 0.407   |
| Ischaemic stroke            | 277.365           | 0.059   | 280.302                 | 0.046   | 285.268                                   | 0.029   |
| Haemorrhagic stroke         | 279.004           | 0.051   | 268.771                 | 0.114   | 280.675                                   | 0.044   |
| Abdominal aortic aneurysm   | 321.031           | <0.001  | 282.789                 | 0.037   | 256.83                                    | 0.245   |
| Thoracic aortic aneurysm    | 247.307           | 0.394   | 261.531                 | 0.185   | 268.47                                    | 0.117   |
| Deep-vein thrombosis        | 687.709           | <0.001  | 644.071                 | <0.001  | 548.314                                   | <0.001  |
| Pulmonary embolism          | 551.886           | <0.001  | 523.416                 | <0.001  | 492.78                                    | <0.001  |
| Peripheral vascular disease | 287.931           | 0.023   | 275.997                 | 0.066   | 278.892                                   | 0.052   |
| Heart failure               | 328.336           | <0.001  | 325.601                 | <0.001  | 280.143                                   | 0.046   |
| Atrial fibrillation         | 462.58            | <0.001  | 444.402                 | <0.001  | 389.05                                    | <0.001  |
| Aortic valve stenosis       | 281.76            | 0.04    | 257.742                 | 0.232   | 251.711                                   | 0.321   |



**Table S6. Mendelian randomization estimates and 95% confidence intervals for cardiovascular outcomes per 1mmol/mol increase in genetically predicted HbA1c levels.** Analyses were performed in 367,703 UK Biobank participants of European ancestries, as well as in those without diabetes, and without diabetes or pre-diabetes.

| Disease                     | Entire Population   |         | With diabetics and pre-diabetics excluded |         | With diabetics and pre-diabetics excluded |         |
|-----------------------------|---------------------|---------|-------------------------------------------|---------|-------------------------------------------|---------|
|                             | Odds Ratio (95% CI) | P-value | Odds Ratio (95% CI)                       | P-value | Odds Ratio (95% CI)                       | P-value |
| Coronary artery disease     | 1.036 (1.024-1.049) | <0.001  | 1.027 (1.014-1.039)                       | <0.001  | 1.007 (0.994-1.021)                       | 0.27    |
| Stroke (All)                | 1.027 (1.012-1.042) | <0.001  | 1.023 (1.007-1.040)                       | 0.006   | 1.014 (0.995-1.032)                       | 0.148   |
| Ischaemic stroke            | 1.015 (0.994-1.038) | 0.168   | 1.009 (0.985-1.033)                       | 0.465   | 0.991 (0.965-1.019)                       | 0.529   |
| Haemorrhagic stroke         | 1.040 (1.007-1.073) | 0.016   | 1.039 (1.005-1.075)                       | 0.025   | 1.058 (1.020-1.097)                       | 0.002   |
| Abdominal aortic aneurysm   | 0.982 (0.940-1.025) | 0.406   | 0.970 (0.925-1.017)                       | 0.213   | 0.960 (0.906-1.017)                       | 0.161   |
| Thoracic aortic aneurysm    | 1.001 (0.931-1.076) | 0.986   | 0.990 (0.916-1.070)                       | 0.793   | 0.974 (0.896-1.060)                       | 0.544   |
| Deep-vein thrombosis        | 1.002 (0.982-1.023) | 0.854   | 0.997 (0.975-1.019)                       | 0.756   | 0.991 (0.968-1.014)                       | 0.42    |
| Pulmonary embolism          | 1.029 (1.005-1.054) | 0.018   | 1.028 (1.002-1.054)                       | 0.035   | 1.019 (0.991-1.048)                       | 0.182   |
| Peripheral vascular disease | 1.036 (1.011-1.062) | 0.005   | 1.025 (0.995-1.055)                       | 0.099   | 0.999 (0.966-1.033)                       | 0.951   |
| Heart failure               | 1.017 (0.999-1.035) | 0.063   | 0.997 (0.976-1.018)                       | 0.754   | 0.981 (0.957-1.006)                       | 0.129   |
| Atrial fibrillation         | 0.999 (0.986-1.012) | 0.908   | 0.991 (0.978-1.005)                       | 0.225   | 0.988 (0.973-1.003)                       | 0.118   |
| Aortic valve stenosis       | 1.031 (1.000-1.064) | 0.053   | 1.015 (0.982-1.050)                       | 0.374   | 1.005 (0.968-1.043)                       | 0.806   |

**Table S7. Mendelian randomization estimates for cardiovascular outcomes per 1mmol/mol increase in genetically predicted HbA1c levels in supplementary analyses using 213 non-erythrocytic HbA1c variants.**

| Disease                     | Odds Ratio (95% CI) | P-value |
|-----------------------------|---------------------|---------|
| Coronary artery disease     | 1.070 (1.050-1.091) | <0.001  |
| Stroke (All)                | 1.032 (1.006-1.058) | 0.015   |
| Ischaemic stroke            | 1.031 (0.994-1.070) | 0.098   |
| Haemorrhagic stroke         | 1.037 (0.981-1.097) | 0.198   |
| Abdominal aortic aneurysm   | 1.025 (0.949-1.108) | 0.53    |
| Thoracic aortic aneurysm    | 0.950 (0.828-1.089) | 0.458   |
| Deep-vein thrombosis        | 0.990 (0.963-1.017) | 0.47    |
| Pulmonary embolism          | 0.998 (0.964-1.032) | 0.896   |
| Peripheral vascular disease | 1.083 (1.036-1.133) | <0.001  |
| Heart failure               | 1.026 (0.995-1.057) | 0.097   |
| Atrial fibrillation         | 0.983 (0.961-1.006) | 0.141   |
| Aortic valve stenosis       | 1.071 (1.014-1.131) | 0.014   |

**Table S8. Mendelian randomization estimates for cardiovascular outcomes per 1mmol/mol increase in genetically predicted HbA1c levels in sensitivity analyses.** Analyses were performed in 367,703 UK Biobank participants of European ancestries, using weighted median method and MR-Egger method.

| Disease                     | Weighted median         |             | MR-Egger                |             |                 |             |
|-----------------------------|-------------------------|-------------|-------------------------|-------------|-----------------|-------------|
|                             | Odds Ratio<br>(95% CI)  | P-<br>value | Odds Ratio<br>(95% CI)  | P-<br>value | Y-<br>intercept | P-<br>value |
| Coronary artery disease     | 1.045 (1.028-<br>1.061) | <0.001      | 1.019 (0.998-<br>1.041) | 0.077       | 0.002           | 0.059       |
| Stroke (All)                | 1.028 (1.004-<br>1.054) | 0.025       | 1.016 (0.989-<br>1.043) | 0.246       | 0.001           | 0.343       |
| Ischaemic stroke            | 1.001 (0.967-<br>1.036) | 0.958       | 0.990 (0.953-<br>1.030) | 0.628       | 0.003           | 0.13        |
| Haemorrhagic stroke         | 1.023 (0.971-<br>1.078) | 0.398       | 1.022 (0.966-<br>1.081) | 0.448       | 0.002           | 0.479       |
| Abdominal aortic aneurysm   | 0.985 (0.916-<br>1.058) | 0.673       | 0.951 (0.881-<br>1.027) | 0.202       | 0.004           | 0.327       |
| Thoracic aortic aneurysm    | 0.927 (0.816-<br>1.052) | 0.239       | 1.077 (0.945-<br>1.226) | 0.266       | -0.01           | 0.185       |
| Deep-vein thrombosis        | 0.988 (0.964-<br>1.013) | 0.338       | 0.974 (0.939-<br>1.010) | 0.157       | 0.004           | 0.067       |
| Pulmonary embolism          | 1.029 (0.998-<br>1.060) | 0.064       | 1.007 (0.965-<br>1.052) | 0.744       | 0.003           | 0.233       |
| Peripheral vascular disease | 1.022 (0.982-<br>1.064) | 0.284       | 1.017 (0.973-<br>1.064) | 0.449       | 0.003           | 0.34        |
| Heart failure               | 1.010 (0.981-<br>1.040) | 0.517       | 1.003 (0.972-<br>1.036) | 0.834       | 0.002           | 0.318       |
| Atrial fibrillation         | 0.997 (0.979-<br>1.017) | 0.784       | 1.006 (0.983-<br>1.030) | 0.608       | -0.001          | 0.487       |
| Aortic valve stenosis       | 1.020 (0.971-<br>1.072) | 0.437       | 1.038 (0.982-<br>1.098) | 0.187       | -0.001          | 0.769       |

**Table S9. Cochran's Q statistics and p-values of heterogeneity test for Mendelian randomization estimates of HbA1c on cardiovascular outcomes.**

| Disease                     | Entire Population |         | With diabetics excluded |         | With diabetics and pre-diabetics excluded |         |
|-----------------------------|-------------------|---------|-------------------------|---------|-------------------------------------------|---------|
|                             | Cochran's Q       | P-value | Cochran's Q             | P-value | Cochran's Q                               | P-value |
| Coronary artery disease     | 1057.748          | <0.001  | 911.267                 | <0.001  | 830.687                                   | <0.001  |
| Stroke (All)                | 613.619           | 0.01    | 607.327                 | 0.016   | 595.947                                   | 0.035   |
| Ischaemic stroke            | 644.403           | 0.001   | 622.053                 | 0.005   | 612.775                                   | 0.011   |
| Haemorrhagic stroke         | 594.2             | 0.039   | 582.989                 | 0.074   | 572.32                                    | 0.128   |
| Abdominal aortic aneurysm   | 626.071           | 0.004   | 630.092                 | 0.003   | 625.811                                   | 0.004   |
| Thoracic aortic aneurysm    | 546.148           | 0.36    | 570.275                 | 0.141   | 568.392                                   | 0.154   |
| Deep-vein thrombosis        | 1178.211          | <0.001  | 1127.194                | <0.001  | 1008.408                                  | <0.001  |
| Pulmonary embolism          | 1046.702          | <0.001  | 1003.721                | <0.001  | 955.85                                    | <0.001  |
| Peripheral vascular disease | 632.662           | 0.002   | 632.604                 | 0.002   | 611.626                                   | 0.012   |
| Heart failure               | 630.673           | 0.003   | 626.037                 | 0.004   | 659.092                                   | <0.001  |
| Atrial fibrillation         | 784.411           | <0.001  | 753.166                 | <0.001  | 714.868                                   | <0.001  |
| Aortic valve stenosis       | 647.875           | 0.001   | 583.057                 | 0.074   | 565.814                                   | 0.172   |

**Table S10. Genetic instruments of 243 T2DM variants and details of associations with T2DM.**

| SNP         | Effect allele | Alternative allele | Frequency of effect allele | $\beta$ -coefficient with T2DM |                |          |
|-------------|---------------|--------------------|----------------------------|--------------------------------|----------------|----------|
|             |               |                    |                            | $\beta$ -coefficient           | Standard error | P-value  |
| rs184660829 | T             | C                  | 1                          | -2.1                           | 0.37           | 2.50E-08 |
| rs1127215   | T             | C                  | 0.42                       | -0.047                         | 0.0064         | 2.30E-13 |
| rs1493694   | T             | C                  | 0.11                       | 0.084                          | 0.01           | 2.10E-16 |
| rs145904381 | T             | C                  | 0.99                       | 0.17                           | 0.031          | 2.20E-08 |
| rs539515    | A             | C                  | 0.8                        | -0.051                         | 0.008          | 1.20E-10 |
| rs12048743  | C             | G                  | 0.56                       | -0.038                         | 0.0064         | 4.40E-09 |
| rs9430095   | C             | G                  | 0.49                       | 0.036                          | 0.0064         | 2.30E-08 |
| rs340874    | T             | C                  | 0.44                       | -0.068                         | 0.0064         | 5.60E-26 |
| rs2820446   | C             | G                  | 0.71                       | 0.057                          | 0.007          | 3.70E-16 |
| rs348330    | A             | G                  | 0.64                       | -0.051                         | 0.0067         | 3.90E-14 |
| rs291367    | A             | G                  | 0.37                       | -0.044                         | 0.007          | 6.10E-10 |
| rs3768321   | T             | G                  | 0.2                        | 0.085                          | 0.008          | 1.30E-26 |
| rs58432198  | T             | C                  | 0.12                       | -0.065                         | 0.01           | 1.80E-10 |
| rs12140153  | T             | G                  | 0.095                      | -0.064                         | 0.011          | 1.20E-08 |
| rs7903146   | T             | C                  | 0.29                       | 0.31                           | 0.0069         | 0.00E+00 |
| rs72631105  | A             | G                  | 0.19                       | 0.044                          | 0.0083         | 8.00E-08 |
| rs11257655  | T             | C                  | 0.22                       | 0.09                           | 0.0076         | 3.70E-32 |
| rs2280141   | T             | G                  | 0.52                       | 0.047                          | 0.0063         | 2.00E-13 |
| rs2642588   | T             | G                  | 0.3                        | -0.052                         | 0.0069         | 6.30E-14 |
| rs703972    | C             | G                  | 0.47                       | -0.071                         | 0.0064         | 2.50E-28 |
| rs11202627  | T             | C                  | 0.15                       | 0.044                          | 0.0089         | 7.60E-07 |
| rs10882101  | T             | C                  | 0.59                       | 0.11                           | 0.0064         | 1.60E-62 |
| rs67232546  | T             | C                  | 0.21                       | 0.056                          | 0.008          | 1.40E-12 |
| rs141521721 | A             | C                  | 0.024                      | 0.12                           | 0.021          | 2.80E-08 |
| rs5213      | T             | C                  | 0.64                       | -0.071                         | 0.0066         | 1.90E-26 |
| rs4929965   | A             | G                  | 0.38                       | 0.07                           | 0.0067         | 4.80E-25 |
| rs4923543   | A             | G                  | 0.33                       | 0.026                          | 0.0067         | 1.00E-04 |
| rs2237895   | A             | C                  | 0.57                       | -0.093                         | 0.0066         | 3.60E-44 |
| rs145678014 | T             | G                  | 0.043                      | -0.11                          | 0.016          | 1.10E-11 |
| rs2767036   | A             | C                  | 0.71                       | -0.039                         | 0.0069         | 2.50E-08 |
| rs1061810   | A             | C                  | 0.29                       | 0.05                           | 0.007          | 8.50E-13 |
| rs7115753   | A             | G                  | 0.45                       | 0.038                          | 0.0064         | 4.80E-09 |
| rs7124681   | A             | C                  | 0.41                       | 0.037                          | 0.0064         | 6.40E-09 |
| rs1783541   | T             | C                  | 0.2                        | 0.061                          | 0.008          | 1.40E-14 |
| rs11820019  | T             | C                  | 0.97                       | 0.14                           | 0.021          | 1.00E-11 |
| rs77464186  | A             | C                  | 0.84                       | 0.11                           | 0.0088         | 2.30E-33 |
| rs10830963  | C             | G                  | 0.72                       | -0.099                         | 0.0071         | 1.50E-43 |
| rs1426371   | A             | G                  | 0.26                       | -0.05                          | 0.0073         | 1.10E-11 |
| rs34965774  | A             | G                  | 0.14                       | 0.054                          | 0.0092         | 3.50E-09 |
| rs56348580  | C             | G                  | 0.31                       | -0.062                         | 0.0069         | 3.80E-19 |

| SNP         | Effect allele | Alternative allele | Frequency of effect allele | $\beta$ -coefficient with T2DM |                |          |
|-------------|---------------|--------------------|----------------------------|--------------------------------|----------------|----------|
|             |               |                    |                            | $\beta$ -coefficient           | Standard error | P-value  |
| rs4148856   | C             | G                  | 0.78                       | 0.049                          | 0.0077         | 2.20E-10 |
| rs7978610   | C             | G                  | 0.33                       | -0.034                         | 0.0067         | 5.40E-07 |
| rs2066827   | T             | G                  | 0.77                       | -0.044                         | 0.0081         | 3.50E-08 |
| rs12811407  | A             | G                  | 0.33                       | 0.049                          | 0.007          | 2.40E-12 |
| rs718314    | A             | G                  | 0.75                       | -0.047                         | 0.0073         | 1.10E-10 |
| rs10842994  | T             | C                  | 0.19                       | -0.074                         | 0.0081         | 2.50E-20 |
| rs76895963  | T             | G                  | 0.98                       | 0.48                           | 0.027          | 5.30E-70 |
| rs2258238   | A             | T                  | 0.9                        | -0.11                          | 0.011          | 2.00E-25 |
| rs1796330   | C             | G                  | 0.43                       | -0.049                         | 0.0064         | 3.20E-14 |
| rs2197973   | T             | C                  | 0.54                       | 0.035                          | 0.0063         | 4.40E-08 |
| rs77864822  | A             | G                  | 0.93                       | 0.073                          | 0.013          | 2.20E-08 |
| rs7987740   | T             | C                  | 0.61                       | 0.036                          | 0.0065         | 4.10E-08 |
| rs34584161  | A             | G                  | 0.76                       | 0.048                          | 0.0075         | 2.90E-10 |
| rs11842871  | T             | G                  | 0.27                       | -0.042                         | 0.0073         | 1.50E-08 |
| rs576674    | A             | G                  | 0.83                       | -0.053                         | 0.0086         | 6.80E-10 |
| rs963740    | A             | T                  | 0.71                       | 0.039                          | 0.007          | 2.60E-08 |
| rs9537803   | T             | C                  | 0.72                       | -0.034                         | 0.007          | 1.30E-06 |
| rs9563615   | A             | T                  | 0.71                       | 0.042                          | 0.007          | 3.90E-09 |
| rs1359790   | A             | G                  | 0.28                       | -0.083                         | 0.0071         | 5.70E-31 |
| rs62007683  | T             | G                  | 0.35                       | -0.037                         | 0.0067         | 3.80E-08 |
| rs17122772  | C             | G                  | 0.77                       | -0.043                         | 0.0077         | 2.00E-08 |
| rs17522122  | T             | G                  | 0.47                       | 0.038                          | 0.0064         | 4.00E-09 |
| rs8017808   | T             | G                  | 0.26                       | -0.041                         | 0.0073         | 2.60E-08 |
| rs17836088  | C             | G                  | 0.22                       | 0.058                          | 0.0077         | 9.70E-14 |
| rs8010382   | A             | G                  | 0.58                       | -0.038                         | 0.0066         | 8.10E-09 |
| rs34715063  | T             | C                  | 0.88                       | -0.076                         | 0.01           | 3.30E-14 |
| rs11070332  | A             | G                  | 0.36                       | 0.049                          | 0.0066         | 1.30E-13 |
| rs2456530   | T             | C                  | 0.13                       | 0.056                          | 0.0096         | 4.70E-09 |
| rs528350911 | C             | G                  | 0.99                       | -0.24                          | 0.043          | 2.10E-08 |
| rs117483894 | A             | G                  | 0.96                       | -0.093                         | 0.017          | 3.90E-08 |
| rs8037894   | C             | G                  | 0.43                       | -0.047                         | 0.0064         | 3.70E-13 |
| rs7178762   | T             | C                  | 0.54                       | -0.039                         | 0.0063         | 7.00E-10 |
| rs4776970   | A             | T                  | 0.64                       | 0.039                          | 0.0066         | 6.20E-09 |
| rs13737     | T             | G                  | 0.24                       | -0.046                         | 0.0075         | 7.30E-10 |
| rs1005752   | A             | C                  | 0.72                       | 0.079                          | 0.007          | 5.70E-29 |
| rs4932265   | T             | C                  | 0.27                       | 0.065                          | 0.0071         | 7.20E-20 |
| rs12910825  | A             | G                  | 0.64                       | -0.053                         | 0.0066         | 2.40E-15 |
| rs8046545   | A             | G                  | 0.64                       | -0.037                         | 0.0066         | 2.30E-08 |
| rs6600191   | T             | C                  | 0.82                       | 0.061                          | 0.0085         | 7.00E-13 |
| rs11642430  | C             | G                  | 0.6                        | -0.042                         | 0.0065         | 1.20E-10 |
| rs3751837   | T             | C                  | 0.22                       | 0.044                          | 0.0077         | 1.70E-08 |
| rs1421085   | T             | C                  | 0.58                       | -0.12                          | 0.0064         | 2.40E-78 |
| rs862320    | T             | C                  | 0.42                       | -0.042                         | 0.0064         | 5.10E-11 |

| SNP         | Effect allele | Alternative allele | Frequency of effect allele | $\beta$ -coefficient with T2DM |                |          |
|-------------|---------------|--------------------|----------------------------|--------------------------------|----------------|----------|
|             |               |                    |                            | $\beta$ -coefficient           | Standard error | P-value  |
| rs72802342  | A             | C                  | 0.077                      | -0.13                          | 0.012          | 1.30E-27 |
| rs2925979   | T             | C                  | 0.3                        | 0.053                          | 0.0069         | 2.10E-14 |
| rs12920022  | A             | T                  | 0.16                       | 0.053                          | 0.009          | 2.90E-09 |
| rs4925109   | A             | G                  | 0.32                       | 0.048                          | 0.0068         | 3.90E-12 |
| rs71372253  | T             | C                  | 0.94                       | -0.073                         | 0.013          | 4.30E-08 |
| rs10908278  | A             | T                  | 0.52                       | -0.074                         | 0.0064         | 3.10E-30 |
| rs1377807   | C             | G                  | 0.31                       | 0.057                          | 0.0068         | 5.70E-17 |
| rs34855406  | C             | G                  | 0.28                       | 0.05                           | 0.0071         | 3.20E-12 |
| rs35895680  | A             | C                  | 0.32                       | -0.055                         | 0.0069         | 3.80E-15 |
| rs569511541 | A             | G                  | 1                          | -2                             | 0.36           | 1.50E-08 |
| rs60276348  | T             | C                  | 0.14                       | 0.052                          | 0.0095         | 2.90E-08 |
| rs61676547  | C             | G                  | 0.19                       | 0.055                          | 0.0081         | 1.00E-11 |
| rs1641523   | T             | C                  | 0.57                       | -0.028                         | 0.0064         | 1.30E-05 |
| rs7222481   | C             | G                  | 0.32                       | 0.039                          | 0.0068         | 1.70E-08 |
| rs62080313  | T             | C                  | 0.88                       | -0.056                         | 0.0098         | 9.10E-09 |
| rs72926932  | A             | C                  | 0.92                       | -0.083                         | 0.011          | 3.60E-13 |
| rs17684074  | C             | G                  | 0.26                       | -0.041                         | 0.0073         | 3.50E-08 |
| rs9957145   | A             | G                  | 0.17                       | -0.05                          | 0.0086         | 6.70E-09 |
| rs523288    | A             | T                  | 0.76                       | -0.056                         | 0.0074         | 7.50E-14 |
| rs12454712  | T             | C                  | 0.61                       | 0.049                          | 0.0067         | 5.10E-13 |
| rs7240767   | T             | C                  | 0.62                       | -0.037                         | 0.0065         | 2.00E-08 |
| rs3111316   | A             | G                  | 0.59                       | 0.046                          | 0.0065         | 1.60E-12 |
| rs8107974   | A             | T                  | 0.92                       | -0.093                         | 0.012          | 6.30E-15 |
| rs10406327  | C             | G                  | 0.52                       | 0.035                          | 0.0064         | 4.60E-08 |
| rs429358    | T             | C                  | 0.85                       | 0.08                           | 0.0092         | 1.80E-18 |
| rs10406431  | A             | G                  | 0.56                       | 0.059                          | 0.0065         | 2.50E-19 |
| rs3810291   | A             | G                  | 0.67                       | 0.046                          | 0.0068         | 1.20E-11 |
| rs7249758   | A             | G                  | 0.2                        | 0.045                          | 0.008          | 1.20E-08 |
| rs75253922  | T             | C                  | 0.81                       | -0.046                         | 0.0082         | 2.20E-08 |
| rs4804833   | A             | G                  | 0.39                       | 0.047                          | 0.0066         | 1.10E-12 |
| rs562386202 | A             | G                  | 1                          | -1.2                           | 0.21           | 4.20E-08 |
| rs11688682  | C             | G                  | 0.27                       | -0.058                         | 0.0075         | 1.40E-14 |
| rs35999103  | T             | C                  | 0.15                       | 0.052                          | 0.0091         | 8.30E-09 |
| rs13426680  | A             | G                  | 0.94                       | 0.082                          | 0.013          | 6.40E-10 |
| rs3772071   | T             | C                  | 0.71                       | 0.048                          | 0.007          | 1.60E-11 |
| rs10195252  | T             | C                  | 0.59                       | 0.06                           | 0.0064         | 1.60E-20 |
| rs11680058  | A             | G                  | 0.86                       | 0.058                          | 0.01           | 1.30E-08 |
| rs113414093 | A             | G                  | 0.061                      | 0.08                           | 0.016          | 6.40E-07 |
| rs2972144   | A             | G                  | 0.36                       | -0.094                         | 0.0066         | 7.90E-46 |
| rs17802463  | T             | G                  | 0.27                       | -0.039                         | 0.0071         | 3.50E-08 |
| rs1260326   | T             | C                  | 0.39                       | -0.067                         | 0.0065         | 1.30E-24 |
| rs62107261  | T             | C                  | 0.95                       | 0.11                           | 0.016          | 1.80E-11 |
| rs80147536  | A             | T                  | 0.9                        | 0.13                           | 0.011          | 2.70E-30 |

| SNP         | Effect allele | Alternative allele | Frequency of effect allele | $\beta$ -coefficient with T2DM |                |          |
|-------------|---------------|--------------------|----------------------------|--------------------------------|----------------|----------|
|             |               |                    |                            | $\beta$ -coefficient           | Standard error | P-value  |
| rs6545714   | A             | G                  | 0.61                       | -0.037                         | 0.0065         | 1.70E-08 |
| rs243024    | A             | G                  | 0.46                       | 0.058                          | 0.0063         | 4.40E-20 |
| rs2249105   | A             | G                  | 0.63                       | 0.053                          | 0.0066         | 1.20E-15 |
| rs79046683  | T             | G                  | 0.0045                     | 0.74                           | 0.14           | 1.80E-07 |
| rs13041756  | T             | C                  | 0.89                       | -0.058                         | 0.01           | 1.30E-08 |
| rs2268078   | A             | G                  | 0.66                       | 0.043                          | 0.0067         | 2.90E-10 |
| rs1800961   | T             | C                  | 0.035                      | 0.16                           | 0.017          | 3.20E-20 |
| rs6063048   | A             | G                  | 0.28                       | -0.047                         | 0.0071         | 5.80E-11 |
| rs11699802  | T             | C                  | 0.46                       | -0.043                         | 0.0064         | 2.50E-11 |
| rs34454109  | A             | T                  | 0.77                       | 0.044                          | 0.0076         | 8.80E-09 |
| rs6070625   | C             | G                  | 0.48                       | -0.044                         | 0.0063         | 3.20E-12 |
| rs59944054  | A             | G                  | 0.24                       | 0.033                          | 0.0079         | 2.90E-05 |
| rs6518681   | A             | G                  | 0.086                      | -0.083                         | 0.012          | 9.60E-13 |
| rs117001013 | T             | C                  | 0.088                      | -0.065                         | 0.011          | 1.50E-08 |
| rs5758223   | A             | G                  | 0.72                       | 0.038                          | 0.007          | 4.60E-08 |
| rs738408    | T             | C                  | 0.23                       | 0.049                          | 0.0076         | 1.80E-10 |
| rs1801645   | T             | C                  | 0.72                       | -0.048                         | 0.0074         | 1.50E-10 |
| rs11708067  | A             | G                  | 0.77                       | 0.089                          | 0.0076         | 1.30E-31 |
| rs11709077  | A             | G                  | 0.12                       | -0.11                          | 0.0098         | 1.60E-27 |
| rs649961    | T             | C                  | 0.47                       | 0.038                          | 0.0063         | 1.30E-09 |
| rs9828772   | C             | G                  | 0.9                        | 0.059                          | 0.011          | 4.20E-08 |
| rs62271373  | A             | T                  | 0.055                      | 0.088                          | 0.014          | 1.00E-09 |
| rs13065698  | A             | G                  | 0.6                        | 0.039                          | 0.0065         | 3.60E-09 |
| rs7629630   | A             | T                  | 0.86                       | 0.051                          | 0.0091         | 2.20E-08 |
| rs9873618   | A             | G                  | 0.29                       | -0.066                         | 0.007          | 8.50E-21 |
| rs2872246   | A             | C                  | 0.45                       | 0.036                          | 0.0063         | 1.80E-08 |
| rs6780171   | A             | T                  | 0.31                       | 0.11                           | 0.0068         | 2.50E-58 |
| rs3887925   | T             | C                  | 0.55                       | 0.055                          | 0.0064         | 1.40E-17 |
| rs4686471   | T             | C                  | 0.39                       | -0.06                          | 0.0065         | 3.10E-20 |
| rs35352848  | T             | C                  | 0.79                       | 0.071                          | 0.0079         | 9.50E-20 |
| rs11926707  | T             | C                  | 0.37                       | -0.038                         | 0.0066         | 1.50E-08 |
| rs4688760   | T             | C                  | 0.68                       | 0.043                          | 0.0069         | 4.50E-10 |
| rs2581787   | T             | G                  | 0.56                       | 0.036                          | 0.0064         | 3.00E-08 |
| rs76263492  | T             | G                  | 0.045                      | 0.091                          | 0.016          | 6.30E-09 |
| rs3774723   | A             | G                  | 0.16                       | -0.065                         | 0.0089         | 2.00E-13 |
| rs9860730   | A             | G                  | 0.7                        | 0.055                          | 0.007          | 7.40E-15 |
| rs13085136  | T             | C                  | 0.072                      | -0.074                         | 0.013          | 1.40E-08 |
| rs2272163   | A             | C                  | 0.38                       | -0.037                         | 0.0065         | 1.20E-08 |
| rs1580278   | A             | C                  | 0.53                       | -0.041                         | 0.0064         | 2.90E-10 |
| rs1296328   | A             | C                  | 0.45                       | 0.035                          | 0.0064         | 4.30E-08 |
| rs7669833   | A             | T                  | 0.3                        | -0.054                         | 0.007          | 1.80E-14 |
| rs28819812  | A             | C                  | 0.32                       | -0.04                          | 0.0072         | 2.70E-08 |
| rs12640250  | A             | C                  | 0.29                       | -0.039                         | 0.0071         | 4.50E-08 |



| SNP         | Effect allele | Alternative allele | Frequency of effect allele | $\beta$ -coefficient with T2DM |                |          |
|-------------|---------------|--------------------|----------------------------|--------------------------------|----------------|----------|
|             |               |                    |                            | $\beta$ -coefficient           | Standard error | P-value  |
| rs56337234  | T             | C                  | 0.5                        | -0.057                         | 0.0066         | 1.40E-17 |
| rs58730668  | T             | C                  | 0.86                       | 0.068                          | 0.0092         | 1.00E-13 |
| rs362307    | T             | C                  | 0.077                      | 0.074                          | 0.012          | 1.10E-09 |
| rs10938398  | A             | G                  | 0.43                       | 0.044                          | 0.0064         | 4.90E-12 |
| rs2102278   | A             | G                  | 0.68                       | -0.038                         | 0.0069         | 4.50E-08 |
| rs10937721  | C             | G                  | 0.59                       | 0.087                          | 0.0065         | 1.60E-40 |
| rs1531583   | T             | G                  | 0.046                      | 0.11                           | 0.015          | 1.20E-12 |
| rs12642790  | A             | G                  | 0.34                       | 0.042                          | 0.0067         | 5.70E-10 |
| rs1903002   | C             | G                  | 0.5                        | -0.036                         | 0.0064         | 3.00E-08 |
| rs6821438   | A             | G                  | 0.53                       | 0.042                          | 0.0063         | 5.40E-11 |
| rs138337556 | A             | G                  | 1                          | -0.53                          | 0.074          | 8.90E-13 |
| rs115505614 | T             | C                  | 0.05                       | 0.17                           | 0.015          | 1.70E-29 |
| rs329122    | A             | G                  | 0.43                       | 0.037                          | 0.0064         | 9.20E-09 |
| rs78408340  | T             | C                  | 0.0062                     | -0.38                          | 0.047          | 8.70E-16 |
| rs3934712   | T             | C                  | 0.79                       | -0.039                         | 0.0079         | 6.30E-07 |
| rs6884702   | A             | G                  | 0.61                       | -0.038                         | 0.0065         | 5.80E-09 |
| rs3811978   | A             | G                  | 0.83                       | -0.053                         | 0.0085         | 4.20E-10 |
| rs702634    | A             | G                  | 0.69                       | 0.051                          | 0.0069         | 2.10E-13 |
| rs465002    | T             | C                  | 0.74                       | 0.073                          | 0.0073         | 3.80E-23 |
| rs4976033   | A             | G                  | 0.59                       | -0.035                         | 0.0065         | 1.00E-07 |
| rs2307111   | T             | C                  | 0.61                       | 0.053                          | 0.0065         | 3.30E-16 |
| rs4457053   | A             | G                  | 0.7                        | -0.059                         | 0.0069         | 1.40E-17 |
| rs1316776   | A             | C                  | 0.35                       | -0.046                         | 0.0066         | 3.50E-12 |
| rs7719891   | A             | G                  | 0.74                       | -0.04                          | 0.0072         | 2.90E-08 |
| rs4946812   | A             | G                  | 0.33                       | -0.039                         | 0.0068         | 1.00E-08 |
| rs11759026  | A             | G                  | 0.77                       | -0.067                         | 0.0075         | 1.30E-18 |
| rs2800733   | A             | G                  | 0.72                       | 0.051                          | 0.007          | 3.70E-13 |
| rs9494624   | A             | G                  | 0.29                       | 0.041                          | 0.007          | 7.60E-09 |
| rs2982521   | A             | T                  | 0.38                       | 0.034                          | 0.0065         | 3.00E-07 |
| rs474513    | A             | G                  | 0.52                       | 0.039                          | 0.0063         | 1.00E-09 |
| rs4709746   | T             | C                  | 0.13                       | -0.056                         | 0.0096         | 5.00E-09 |
| rs7756992   | A             | G                  | 0.73                       | -0.14                          | 0.007          | 3.00E-87 |
| rs601945    | A             | G                  | 0.82                       | -0.08                          | 0.0085         | 2.70E-21 |
| rs77136196  | T             | C                  | 0.041                      | 0.086                          | 0.017          | 2.00E-07 |
| rs34298980  | T             | C                  | 0.5                        | 0.04                           | 0.0066         | 1.20E-09 |
| rs6458354   | T             | C                  | 0.71                       | -0.051                         | 0.007          | 3.70E-13 |
| rs3798519   | A             | C                  | 0.82                       | -0.058                         | 0.0082         | 1.10E-12 |
| rs555402748 | T             | C                  | 0.0004                     | 1.3                            | 0.24           | 4.60E-08 |
| rs9379084   | A             | G                  | 0.11                       | -0.097                         | 0.011          | 2.30E-20 |
| rs11496066  | T             | C                  | 0.82                       | 0.047                          | 0.0083         | 1.20E-08 |
| rs39328     | T             | C                  | 0.43                       | 0.036                          | 0.0064         | 3.00E-08 |
| rs6976111   | A             | C                  | 0.31                       | 0.042                          | 0.0073         | 1.50E-08 |
| rs1562396   | A             | G                  | 0.68                       | -0.058                         | 0.0069         | 7.60E-17 |

| SNP         | Effect allele | Alternative allele | Frequency of effect allele | $\beta$ -coefficient with T2DM |                |          |
|-------------|---------------|--------------------|----------------------------|--------------------------------|----------------|----------|
|             |               |                    |                            | $\beta$ -coefficient           | Standard error | P-value  |
| rs62492368  | A             | G                  | 0.31                       | 0.044                          | 0.0069         | 1.50E-10 |
| rs10228066  | T             | C                  | 0.54                       | 0.066                          | 0.0063         | 1.90E-25 |
| rs6459733   | C             | G                  | 0.33                       | -0.058                         | 0.0068         | 3.90E-17 |
| rs4279506   | C             | G                  | 0.39                       | -0.039                         | 0.0066         | 5.70E-09 |
| rs1708302   | T             | C                  | 0.49                       | -0.092                         | 0.0063         | 4.20E-48 |
| rs917195    | T             | C                  | 0.23                       | -0.051                         | 0.0077         | 5.60E-11 |
| rs878521    | A             | G                  | 0.25                       | 0.057                          | 0.0074         | 1.60E-14 |
| rs57327348  | A             | T                  | 0.78                       | 0.053                          | 0.0079         | 2.10E-11 |
| rs12680028  | C             | G                  | 0.53                       | 0.035                          | 0.0063         | 3.10E-08 |
| rs3802177   | A             | G                  | 0.31                       | -0.11                          | 0.0069         | 6.30E-55 |
| rs17772814  | A             | G                  | 0.085                      | -0.078                         | 0.013          | 5.00E-10 |
| rs1561927   | T             | C                  | 0.73                       | -0.043                         | 0.0071         | 1.90E-09 |
| rs4977213   | T             | C                  | 0.63                       | -0.051                         | 0.0067         | 4.40E-14 |
| rs10096633  | T             | C                  | 0.12                       | -0.07                          | 0.0098         | 8.70E-13 |
| rs10954772  | T             | C                  | 0.31                       | 0.041                          | 0.0068         | 2.30E-09 |
| rs13262861  | A             | C                  | 0.17                       | -0.094                         | 0.0087         | 1.80E-27 |
| rs10097617  | T             | C                  | 0.48                       | 0.051                          | 0.0063         | 1.10E-15 |
| rs149364428 | A             | G                  | 0.01                       | 0.24                           | 0.034          | 1.90E-12 |
| rs17689007  | A             | G                  | 0.47                       | -0.048                         | 0.0064         | 1.70E-13 |
| rs505922    | T             | C                  | 0.67                       | -0.046                         | 0.0067         | 5.40E-12 |
| rs28505901  | A             | G                  | 0.25                       | -0.076                         | 0.0081         | 2.60E-21 |
| rs7022807   | A             | G                  | 0.6                        | -0.04                          | 0.0064         | 3.60E-10 |
| rs7867635   | T             | C                  | 0.59                       | -0.036                         | 0.0065         | 4.10E-08 |
| rs10811660  | A             | G                  | 0.17                       | -0.16                          | 0.0086         | 6.60E-79 |
| rs1412234   | T             | C                  | 0.68                       | -0.043                         | 0.0068         | 2.50E-10 |
| rs12001437  | T             | C                  | 0.63                       | -0.041                         | 0.0065         | 3.70E-10 |
| rs10974438  | A             | C                  | 0.64                       | -0.051                         | 0.0066         | 1.60E-14 |
| rs11137820  | C             | G                  | 0.58                       | 0.035                          | 0.0064         | 3.60E-08 |
| rs17791513  | A             | G                  | 0.93                       | 0.1                            | 0.013          | 2.90E-14 |
| rs2796441   | A             | G                  | 0.41                       | -0.066                         | 0.0065         | 8.50E-24 |
| rs55653563  | A             | C                  | 0.73                       | 0.043                          | 0.0072         | 3.20E-09 |

**Table S11. Genetic instruments of 536 HbA1c variants and details of associations with HbA1c.** Genetic variants were screened for their associations with erythrocytic traits, including haemoglobin concentration, red blood cell count, haematocrit, mean corpuscular volume, mean corpuscular haemoglobin concentration, mean corpuscular haemoglobin, red cell distribution width, reticulocyte count, reticulocyte fraction of red cells, immature fraction of reticulocytes, high light scatter percentage of red cells and high light scatter reticulocyte count. Erythrocytic variants are variants associated with any of these traits with a P-value<0.001.

| SNP                        | Effect allele | Alternative allele | Frequency of effect allele | β-coefficient with HbA1c (mmol/mol) |                |           | R2       | F-statistics |
|----------------------------|---------------|--------------------|----------------------------|-------------------------------------|----------------|-----------|----------|--------------|
|                            |               |                    |                            | β-coefficient                       | Standard error | P-value   |          |              |
| Non-erythrocytic variants: |               |                    |                            |                                     |                |           |          |              |
| rs13431652                 | T             | C                  | 0.310                      | 0.404                               | 0.011          | 0.00E+00  | 5.81E-04 | 237.67       |
| rs1004558                  | C             | T                  | 0.178                      | -0.448                              | 0.011          | 1.40E-320 | 4.81E-04 | 196.64       |
| 2:169809199                | TTG           | T                  | 0.442                      | -0.284                              | 0.011          | 2.90E-180 | 3.36E-04 | 137.66       |
| rs10830963                 | C             | G                  | 0.274                      | -0.240                              | 0.011          | 4.10E-128 | 1.89E-04 | 77.44        |
| rs7903146                  | C             | T                  | 0.286                      | -0.197                              | 0.011          | 7.70E-91  | 1.34E-04 | 54.62        |
| rs11708067                 | A             | G                  | 0.247                      | 0.186                               | 0.011          | 1.40E-75  | 1.11E-04 | 45.35        |
| rs12611808                 | T             | C                  | 0.321                      | -0.164                              | 0.011          | 1.40E-64  | 9.42E-05 | 38.52        |
| rs1604038                  | C             | T                  | 0.285                      | 0.164                               | 0.011          | 1.70E-60  | 8.80E-05 | 35.99        |
| rs71430652                 | T             | C                  | 0.133                      | -0.208                              | 0.011          | 7.50E-58  | 8.50E-05 | 34.78        |
| rs76323047                 | A             | G                  | 0.118                      | -0.219                              | 0.011          | 6.00E-57  | 8.34E-05 | 34.12        |
| rs10811660                 | G             | A                  | 0.175                      | 0.175                               | 0.011          | 1.80E-53  | 7.76E-05 | 31.75        |
| rs61944004                 | G             | A                  | 0.218                      | -0.142                              | 0.011          | 2.30E-42  | 6.11E-05 | 24.99        |
| rs368865                   | A             | G                  | 0.274                      | -0.131                              | 0.011          | 2.40E-40  | 5.78E-05 | 23.63        |
| rs138917529                | A             | T                  | 0.015                      | 0.459                               | 0.033          | 7.70E-36  | 5.36E-05 | 21.91        |
| rs28378473                 | T             | C                  | 0.267                      | -0.120                              | 0.011          | 4.70E-34  | 4.90E-05 | 20.02        |
| rs12712928                 | G             | C                  | 0.170                      | -0.142                              | 0.011          | 6.30E-31  | 4.46E-05 | 18.25        |
| rs36020935                 | G             | T                  | 0.197                      | -0.131                              | 0.011          | 4.70E-21  | 4.39E-05 | 17.94        |
| rs73032206                 | A             | G                  | 0.032                      | -0.284                              | 0.022          | 3.70E-29  | 4.20E-05 | 17.16        |
| rs11257655                 | C             | T                  | 0.208                      | -0.120                              | 0.011          | 2.40E-29  | 4.14E-05 | 16.93        |
| rs12459419                 | C             | T                  | 0.327                      | 0.109                               | 0.011          | 4.60E-29  | 4.10E-05 | 16.75        |
| rs11564725                 | C             | T                  | 0.235                      | -0.109                              | 0.011          | 1.00E-27  | 3.95E-05 | 16.15        |
| rs115128825                | C             | A                  | 0.020                      | -0.328                              | 0.033          | 5.60E-26  | 3.66E-05 | 14.95        |
| rs17850433                 | T             | C                  | 0.012                      | -0.426                              | 0.044          | 5.30E-26  | 3.62E-05 | 14.82        |
| rs56233660                 | G             | A                  | 0.085                      | -0.164                              | 0.011          | 5.80E-24  | 3.40E-05 | 13.91        |

| SNP         | Effect allele             | Alternative allele | Frequency of effect allele | $\beta$ -coefficient with HbA1c (mmol/mol) |                |          | R2       | F-statistics |
|-------------|---------------------------|--------------------|----------------------------|--------------------------------------------|----------------|----------|----------|--------------|
|             |                           |                    |                            | $\beta$ -coefficient                       | Standard error | P-value  |          |              |
| rs11602873  | A                         | T                  | 0.159                      | 0.120                                      | 0.011          | 2.10E-24 | 3.40E-05 | 13.91        |
| rs2389615   | T                         | C                  | 0.144                      | -0.131                                     | 0.011          | 1.20E-21 | 3.34E-05 | 13.68        |
| rs142394825 | G                         | C                  | 0.014                      | 0.383                                      | 0.044          | 1.40E-22 | 3.32E-05 | 13.58        |
| rs149966    | G                         | T                  | 0.263                      | 0.098                                      | 0.011          | 7.00E-14 | 3.31E-05 | 13.53        |
| rs11531378  | T                         | C                  | 0.300                      | -0.098                                     | 0.011          | 3.90E-23 | 3.23E-05 | 13.20        |
| rs6980437   | T                         | G                  | 0.476                      | -0.087                                     | 0.011          | 8.50E-23 | 3.19E-05 | 13.04        |
| rs860262    | C                         | A                  | 0.497                      | 0.087                                      | 0.011          | 1.20E-22 | 3.14E-05 | 12.83        |
| rs11187140  | G                         | A                  | 0.361                      | 0.087                                      | 0.011          | 5.70E-22 | 3.06E-05 | 12.53        |
| rs146302237 | A                         | AT                 | 0.134                      | 0.120                                      | 0.011          | 3.70E-21 | 3.02E-05 | 12.34        |
| rs10407429  | G                         | A                  | 0.427                      | 0.087                                      | 0.011          | 9.30E-22 | 3.01E-05 | 12.32        |
| rs11540050  | G                         | T                  | 0.050                      | 0.186                                      | 0.022          | 9.40E-20 | 2.73E-05 | 11.18        |
| rs78152251  | T                         | C                  | 0.250                      | 0.087                                      | 0.011          | 2.50E-19 | 2.67E-05 | 10.92        |
| rs45499402  | G                         | C                  | 0.114                      | -0.120                                     | 0.011          | 1.20E-18 | 2.54E-05 | 10.38        |
| rs4418728   | G                         | T                  | 0.449                      | 0.077                                      | 0.011          | 1.30E-18 | 2.54E-05 | 10.37        |
| rs61990729  | C                         | T                  | 0.229                      | 0.087                                      | 0.011          | 1.30E-18 | 2.53E-05 | 10.37        |
| rs143667358 | TATA<br>CATA<br>CATA<br>C | T                  | 0.195                      | -0.098                                     | 0.011          | 3.30E-18 | 2.53E-05 | 10.35        |
| rs576674    | G                         | A                  | 0.166                      | 0.109                                      | 0.011          | 1.80E-18 | 2.52E-05 | 10.31        |
| rs2237895   | A                         | C                  | 0.415                      | -0.077                                     | 0.011          | 1.60E-18 | 2.51E-05 | 10.28        |
| rs4713574   | C                         | G                  | 0.449                      | -0.077                                     | 0.011          | 3.20E-17 | 2.50E-05 | 10.22        |
| rs113204516 | A                         | G                  | 0.050                      | 0.175                                      | 0.022          | 8.40E-18 | 2.49E-05 | 10.18        |
| rs2808454   | A                         | T                  | 0.459                      | -0.077                                     | 0.011          | 6.00E-18 | 2.45E-05 | 10.03        |
| rs143945190 | A                         | G                  | 0.008                      | 0.426                                      | 0.055          | 5.20E-15 | 2.42E-05 | 9.91         |
| rs17168486  | C                         | T                  | 0.174                      | -0.098                                     | 0.011          | 2.70E-17 | 2.36E-05 | 9.67         |
| rs6777684   | A                         | G                  | 0.392                      | -0.077                                     | 0.011          | 5.00E-17 | 2.33E-05 | 9.51         |
| rs71274822  | C                         | CT                 | 0.202                      | 0.087                                      | 0.011          | 4.30E-17 | 2.32E-05 | 9.50         |
| rs28663084  | G                         | A                  | 0.330                      | 0.077                                      | 0.011          | 4.80E-17 | 2.32E-05 | 9.49         |
| rs74598960  | T                         | C                  | 0.061                      | 0.153                                      | 0.022          | 1.00E-15 | 2.24E-05 | 9.15         |

| SNP         | Effect allele | Alternative allele | Frequency of effect allele | $\beta$ -coefficient with HbA1c (mmol/mol) |                |          | R2       | F-statistics |
|-------------|---------------|--------------------|----------------------------|--------------------------------------------|----------------|----------|----------|--------------|
|             |               |                    |                            | $\beta$ -coefficient                       | Standard error | P-value  |          |              |
| rs17508261  | T             | C                  | 0.122                      | -0.109                                     | 0.011          | 2.10E-16 | 2.21E-05 | 9.05         |
| rs75367758  | G             | A                  | 0.049                      | 0.164                                      | 0.022          | 5.40E-16 | 2.16E-05 | 8.81         |
| rs12147688  | G             | T                  | 0.257                      | -0.087                                     | 0.011          | 8.00E-16 | 2.15E-05 | 8.80         |
| rs61138219  | C             | T                  | 0.153                      | 0.098                                      | 0.011          | 1.00E-15 | 2.12E-05 | 8.68         |
| rs238763    | T             | A                  | 0.407                      | 0.077                                      | 0.011          | 1.70E-15 | 2.10E-05 | 8.59         |
| rs3789586   | C             | T                  | 0.153                      | 0.098                                      | 0.011          | 1.40E-15 | 2.10E-05 | 8.57         |
| rs147001976 | G             | A                  | 0.035                      | 0.197                                      | 0.022          | 8.40E-15 | 2.09E-05 | 8.54         |
| rs117056999 | C             | T                  | 0.035                      | -0.197                                     | 0.022          | 2.20E-14 | 2.08E-05 | 8.50         |
| rs3217860   | A             | G                  | 0.248                      | -0.077                                     | 0.011          | 3.00E-15 | 2.06E-05 | 8.43         |
| rs10873398  | G             | A                  | 0.353                      | 0.077                                      | 0.011          | 3.40E-15 | 2.04E-05 | 8.36         |
| rs35474292  | T             | A                  | 0.327                      | -0.077                                     | 0.011          | 3.40E-14 | 2.01E-05 | 8.21         |
| rs79509806  | C             | T                  | 0.025                      | -0.219                                     | 0.033          | 8.50E-15 | 1.99E-05 | 8.14         |
| rs13165038  | T             | C                  | 0.328                      | -0.077                                     | 0.011          | 9.00E-15 | 1.98E-05 | 8.11         |
| rs9366739   | G             | A                  | 0.087                      | -0.120                                     | 0.011          | 8.20E-15 | 1.97E-05 | 8.06         |
| rs1560980   | G             | C                  | 0.042                      | -0.175                                     | 0.022          | 1.20E-14 | 1.95E-05 | 7.99         |
| rs9903102   | A             | C                  | 0.141                      | 0.098                                      | 0.011          | 1.40E-14 | 1.93E-05 | 7.90         |
| rs599134    | C             | G                  | 0.225                      | -0.077                                     | 0.011          | 1.80E-14 | 1.93E-05 | 7.88         |
| rs6973494   | C             | A                  | 0.485                      | -0.066                                     | 0.011          | 4.10E-14 | 1.92E-05 | 7.86         |
| rs4473913   | C             | T                  | 0.499                      | 0.066                                      | 0.011          | 2.60E-14 | 1.90E-05 | 7.77         |
| rs2390730   | C             | T                  | 0.139                      | -0.098                                     | 0.011          | 3.40E-14 | 1.89E-05 | 7.74         |
| rs2812541   | A             | C                  | 0.459                      | -0.066                                     | 0.011          | 3.30E-14 | 1.89E-05 | 7.74         |
| rs116710147 | C             | T                  | 0.013                      | -0.295                                     | 0.044          | 1.20E-13 | 1.85E-05 | 7.55         |
| rs28565268  | T             | C                  | 0.070                      | -0.131                                     | 0.022          | 2.10E-10 | 1.83E-05 | 7.48         |
| rs9302377   | C             | T                  | 0.479                      | -0.066                                     | 0.011          | 1.90E-12 | 1.82E-05 | 7.44         |
| rs7151822   | T             | C                  | 0.248                      | 0.077                                      | 0.011          | 1.40E-13 | 1.80E-05 | 7.38         |
| rs17036143  | G             | T                  | 0.131                      | -0.098                                     | 0.011          | 1.40E-13 | 1.80E-05 | 7.36         |
| rs636089    | T             | C                  | 0.386                      | -0.066                                     | 0.011          | 1.70E-13 | 1.79E-05 | 7.31         |
| rs11768656  | C             | T                  | 0.036                      | 0.175                                      | 0.022          | 1.70E-13 | 1.77E-05 | 7.26         |

| SNP         | Effect allele | Alternative allele | Frequency of effect allele | $\beta$ -coefficient with HbA1c (mmol/mol) |                |          | R2       | F-statistics |
|-------------|---------------|--------------------|----------------------------|--------------------------------------------|----------------|----------|----------|--------------|
|             |               |                    |                            | $\beta$ -coefficient                       | Standard error | P-value  |          |              |
| rs4820059   | G             | A                  | 0.406                      | 0.066                                      | 0.011          | 1.90E-13 | 1.77E-05 | 7.26         |
| rs12969025  | C             | T                  | 0.343                      | 0.066                                      | 0.011          | 2.00E-13 | 1.77E-05 | 7.26         |
| rs28659953  | T             | C                  | 0.391                      | -0.066                                     | 0.011          | 3.40E-13 | 1.77E-05 | 7.24         |
| rs72807721  | C             | T                  | 0.021                      | -0.230                                     | 0.033          | 2.10E-13 | 1.76E-05 | 7.21         |
| rs258222    | C             | T                  | 0.458                      | 0.066                                      | 0.011          | 2.70E-13 | 1.76E-05 | 7.18         |
| rs117473279 | G             | A                  | 0.015                      | 0.262                                      | 0.033          | 2.40E-12 | 1.75E-05 | 7.15         |
| rs184499898 | A             | G                  | 0.011                      | -0.317                                     | 0.044          | 1.10E-12 | 1.75E-05 | 7.15         |
| rs1509896   | G             | C                  | 0.092                      | 0.109                                      | 0.011          | 5.50E-12 | 1.74E-05 | 7.13         |
| 6:29748690  | A             | G                  | 0.320                      | -0.066                                     | 0.011          | 4.80E-13 | 1.73E-05 | 7.09         |
| rs882834    | C             | A                  | 0.140                      | -0.087                                     | 0.011          | 3.70E-13 | 1.73E-05 | 7.07         |
| rs112769772 | T             | G                  | 0.030                      | 0.186                                      | 0.022          | 4.80E-12 | 1.70E-05 | 6.94         |
| rs11597148  | G             | T                  | 0.186                      | -0.077                                     | 0.011          | 2.30E-12 | 1.69E-05 | 6.91         |
| rs757110    | C             | A                  | 0.358                      | 0.066                                      | 0.011          | 8.40E-13 | 1.68E-05 | 6.86         |
| rs3757970   | A             | G                  | 0.379                      | -0.066                                     | 0.011          | 9.80E-13 | 1.66E-05 | 6.80         |
| rs73919194  | T             | A                  | 0.066                      | 0.131                                      | 0.022          | 2.80E-12 | 1.65E-05 | 6.77         |
| rs7317848   | T             | A                  | 0.068                      | -0.120                                     | 0.022          | 1.80E-08 | 1.65E-05 | 6.76         |
| rs150065473 | C             | T                  | 0.008                      | -0.350                                     | 0.055          | 1.50E-11 | 1.64E-05 | 6.69         |
| rs13318260  | A             | G                  | 0.435                      | -0.066                                     | 0.011          | 1.90E-12 | 1.63E-05 | 6.69         |
| rs56087308  | A             | G                  | 0.034                      | -0.175                                     | 0.022          | 1.80E-12 | 1.63E-05 | 6.67         |
| rs72814215  | G             | A                  | 0.013                      | 0.273                                      | 0.044          | 7.70E-11 | 1.62E-05 | 6.62         |
| rs7546017   | C             | T                  | 0.252                      | -0.077                                     | 0.011          | 2.00E-12 | 1.62E-05 | 6.61         |
| rs543159    | C             | A                  | 0.472                      | 0.066                                      | 0.011          | 4.10E-12 | 1.58E-05 | 6.48         |
| rs117777577 | C             | T                  | 0.024                      | -0.197                                     | 0.033          | 7.10E-11 | 1.58E-05 | 6.45         |
| rs35849071  | CA            | C                  | 0.092                      | -0.109                                     | 0.022          | 5.50E-09 | 1.58E-05 | 6.44         |
| rs372855300 | A             | C                  | 0.164                      | 0.087                                      | 0.011          | 3.10E-11 | 1.58E-05 | 6.44         |
| rs9759557   | G             | C                  | 0.274                      | -0.066                                     | 0.011          | 4.40E-12 | 1.57E-05 | 6.44         |
| rs2284344   | G             | C                  | 0.484                      | 0.066                                      | 0.011          | 5.30E-12 | 1.57E-05 | 6.43         |
| rs10743139  | G             | A                  | 0.051                      | 0.142                                      | 0.022          | 4.60E-12 | 1.56E-05 | 6.40         |

| SNP         | Effect allele | Alternative allele | Frequency of effect allele | $\beta$ -coefficient with HbA1c (mmol/mol) |                |          | R2       | F-statistics |
|-------------|---------------|--------------------|----------------------------|--------------------------------------------|----------------|----------|----------|--------------|
|             |               |                    |                            | $\beta$ -coefficient                       | Standard error | P-value  |          |              |
| rs11392438  | T             | TA                 | 0.260                      | 0.066                                      | 0.011          | 3.60E-11 | 1.55E-05 | 6.34         |
| rs925095    | C             | T                  | 0.392                      | 0.066                                      | 0.011          | 9.40E-12 | 1.55E-05 | 6.33         |
| rs1579238   | A             | G                  | 0.241                      | 0.066                                      | 0.011          | 7.10E-12 | 1.54E-05 | 6.29         |
| rs117720468 | G             | C                  | 0.024                      | -0.197                                     | 0.033          | 1.00E-11 | 1.52E-05 | 6.24         |
| rs1248882   | C             | T                  | 0.345                      | -0.066                                     | 0.011          | 1.10E-11 | 1.52E-05 | 6.21         |
| rs2168101   | C             | A                  | 0.311                      | 0.066                                      | 0.011          | 4.00E-11 | 1.51E-05 | 6.20         |
| rs61735313  | G             | T                  | 0.022                      | 0.208                                      | 0.033          | 1.00E-11 | 1.51E-05 | 6.19         |
| rs73082037  | C             | A                  | 0.295                      | 0.066                                      | 0.011          | 1.30E-11 | 1.51E-05 | 6.17         |
| rs55859594  | C             | T                  | 0.069                      | -0.120                                     | 0.022          | 6.70E-11 | 1.50E-05 | 6.13         |
| rs17462188  | C             | T                  | 0.309                      | -0.066                                     | 0.011          | 1.90E-11 | 1.50E-05 | 6.12         |
| rs76957877  | C             | T                  | 0.256                      | 0.066                                      | 0.011          | 2.20E-11 | 1.48E-05 | 6.05         |
| rs2071053   | A             | G                  | 0.266                      | -0.066                                     | 0.011          | 2.10E-11 | 1.47E-05 | 6.01         |
| rs920356    | T             | G                  | 0.272                      | 0.066                                      | 0.011          | 2.40E-11 | 1.47E-05 | 6.00         |
| rs117817570 | G             | A                  | 0.012                      | 0.273                                      | 0.044          | 1.10E-09 | 1.44E-05 | 5.88         |
| rs10863950  | C             | T                  | 0.186                      | -0.077                                     | 0.011          | 3.60E-11 | 1.43E-05 | 5.87         |
| rs201539436 | TA            | T                  | 0.185                      | -0.077                                     | 0.011          | 8.70E-11 | 1.43E-05 | 5.85         |
| rs374017936 | T             | TTA                | 0.263                      | -0.066                                     | 0.011          | 4.70E-11 | 1.43E-05 | 5.84         |
| rs28483077  | A             | G                  | 0.167                      | -0.077                                     | 0.011          | 4.80E-11 | 1.43E-05 | 5.83         |
| rs7603054   | G             | A                  | 0.283                      | 0.066                                      | 0.011          | 4.40E-11 | 1.42E-05 | 5.81         |
| rs73038369  | G             | T                  | 0.406                      | 0.055                                      | 0.011          | 5.10E-11 | 1.42E-05 | 5.80         |
| rs2244566   | A             | C                  | 0.156                      | 0.077                                      | 0.011          | 7.60E-11 | 1.42E-05 | 5.79         |
| rs4779054   | A             | G                  | 0.368                      | -0.055                                     | 0.011          | 1.10E-10 | 1.40E-05 | 5.72         |
| rs2286480   | C             | T                  | 0.327                      | -0.066                                     | 0.011          | 7.60E-11 | 1.40E-05 | 5.72         |
| rs117108573 | C             | T                  | 0.081                      | 0.109                                      | 0.022          | 9.40E-10 | 1.40E-05 | 5.71         |
| rs138157637 | A             | G                  | 0.048                      | 0.131                                      | 0.022          | 2.20E-10 | 1.39E-05 | 5.67         |
| rs492699    | T             | C                  | 0.225                      | -0.066                                     | 0.011          | 4.70E-10 | 1.38E-05 | 5.64         |
| rs7399581   | T             | G                  | 0.115                      | -0.087                                     | 0.011          | 1.20E-10 | 1.36E-05 | 5.56         |
| rs55828957  | A             | T                  | 0.059                      | 0.120                                      | 0.022          | 3.60E-10 | 1.36E-05 | 5.55         |

| SNP         | Effect allele | Alternative allele | Frequency of effect allele | $\beta$ -coefficient with HbA1c (mmol/mol) |                |          | R2       | F-statistics |
|-------------|---------------|--------------------|----------------------------|--------------------------------------------|----------------|----------|----------|--------------|
|             |               |                    |                            | $\beta$ -coefficient                       | Standard error | P-value  |          |              |
| rs12985264  | G             | A                  | 0.323                      | -0.066                                     | 0.011          | 7.70E-09 | 1.33E-05 | 5.45         |
| rs2583934   | G             | T                  | 0.138                      | -0.077                                     | 0.011          | 2.20E-10 | 1.33E-05 | 5.42         |
| rs2786487   | G             | C                  | 0.440                      | -0.055                                     | 0.011          | 2.00E-10 | 1.33E-05 | 5.42         |
| rs144192755 | C             | A                  | 0.012                      | 0.262                                      | 0.044          | 1.00E-09 | 1.31E-05 | 5.36         |
| rs2248933   | G             | T                  | 0.236                      | 0.066                                      | 0.011          | 2.90E-10 | 1.31E-05 | 5.36         |
| rs13327021  | C             | T                  | 0.350                      | -0.055                                     | 0.011          | 2.60E-10 | 1.31E-05 | 5.35         |
| rs1977383   | T             | C                  | 0.450                      | -0.055                                     | 0.011          | 4.60E-10 | 1.29E-05 | 5.29         |
| rs10758593  | G             | A                  | 0.396                      | -0.055                                     | 0.011          | 3.20E-10 | 1.29E-05 | 5.28         |
| rs35781149  | C             | A                  | 0.035                      | 0.153                                      | 0.022          | 5.30E-10 | 1.29E-05 | 5.27         |
| rs13192435  | T             | C                  | 0.025                      | -0.175                                     | 0.033          | 5.50E-10 | 1.26E-05 | 5.16         |
| rs7222851   | T             | C                  | 0.486                      | 0.055                                      | 0.011          | 6.00E-10 | 1.26E-05 | 5.16         |
| rs55689310  | G             | A                  | 0.018                      | -0.208                                     | 0.033          | 6.70E-09 | 1.26E-05 | 5.15         |
| rs6772129   | A             | G                  | 0.292                      | 0.066                                      | 0.011          | 6.60E-10 | 1.25E-05 | 5.13         |
| rs141995849 | G             | A                  | 0.063                      | -0.109                                     | 0.022          | 1.90E-09 | 1.25E-05 | 5.12         |
| rs11070339  | A             | G                  | 0.421                      | -0.055                                     | 0.011          | 9.00E-10 | 1.24E-05 | 5.08         |
| rs7681002   | A             | G                  | 0.484                      | 0.055                                      | 0.011          | 9.00E-10 | 1.24E-05 | 5.06         |
| rs117031158 | G             | A                  | 0.012                      | 0.251                                      | 0.044          | 3.70E-09 | 1.23E-05 | 5.01         |
| rs2220001   | T             | G                  | 0.335                      | -0.055                                     | 0.011          | 1.00E-09 | 1.22E-05 | 5.00         |
| rs151059905 | A             | C                  | 0.026                      | -0.164                                     | 0.033          | 1.40E-09 | 1.22E-05 | 4.98         |
| rs143777421 | C             | A                  | 0.053                      | -0.120                                     | 0.022          | 3.20E-09 | 1.21E-05 | 4.97         |
| rs72729575  | T             | C                  | 0.021                      | -0.186                                     | 0.033          | 1.30E-08 | 1.21E-05 | 4.93         |
| rs6460094   | A             | C                  | 0.409                      | 0.055                                      | 0.011          | 1.60E-09 | 1.20E-05 | 4.92         |
| rs11166447  | T             | C                  | 0.359                      | 0.055                                      | 0.011          | 1.60E-09 | 1.20E-05 | 4.91         |
| rs73129515  | G             | T                  | 0.144                      | -0.077                                     | 0.011          | 1.70E-09 | 1.20E-05 | 4.89         |
| rs35660593  | C             | CA                 | 0.143                      | -0.077                                     | 0.011          | 6.10E-09 | 1.19E-05 | 4.88         |
| rs146933081 | C             | A                  | 0.011                      | 0.262                                      | 0.044          | 4.50E-09 | 1.19E-05 | 4.87         |
| rs68112593  | C             | A                  | 0.243                      | -0.066                                     | 0.011          | 1.70E-09 | 1.19E-05 | 4.87         |
| rs7195055   | C             | T                  | 0.015                      | 0.219                                      | 0.033          | 5.90E-09 | 1.17E-05 | 4.80         |



| SNP         | Effect allele | Alternative allele | Frequency of effect allele | $\beta$ -coefficient with HbA1c (mmol/mol) |                |          | R2       | F-statistics |
|-------------|---------------|--------------------|----------------------------|--------------------------------------------|----------------|----------|----------|--------------|
|             |               |                    |                            | $\beta$ -coefficient                       | Standard error | P-value  |          |              |
| rs10657263  | C             | G                  | 0.455                      | 0.055                                      | 0.011          | 2.40E-09 | 1.17E-05 | 4.79         |
| rs77020674  | C             | A                  | 0.028                      | 0.164                                      | 0.033          | 7.70E-09 | 1.17E-05 | 4.77         |
| rs879619    | G             | A                  | 0.136                      | -0.077                                     | 0.011          | 3.10E-09 | 1.16E-05 | 4.76         |
| rs16864320  | A             | T                  | 0.111                      | 0.087                                      | 0.011          | 2.70E-09 | 1.16E-05 | 4.76         |
| rs2966083   | G             | T                  | 0.452                      | 0.055                                      | 0.011          | 3.10E-09 | 1.16E-05 | 4.74         |
| rs11454405  | A             | AT                 | 0.388                      | 0.055                                      | 0.011          | 5.20E-09 | 1.16E-05 | 4.74         |
| rs142391093 | A             | G                  | 0.245                      | -0.066                                     | 0.011          | 4.50E-09 | 1.16E-05 | 4.73         |
| rs9462407   | T             | C                  | 0.113                      | -0.087                                     | 0.011          | 3.10E-09 | 1.16E-05 | 4.73         |
| rs148644119 | A             | ACT                | 0.079                      | 0.098                                      | 0.022          | 4.50E-09 | 1.15E-05 | 4.72         |
| rs2987456   | T             | C                  | 0.057                      | -0.109                                     | 0.022          | 3.20E-09 | 1.15E-05 | 4.71         |
| rs62019188  | G             | A                  | 0.420                      | 0.055                                      | 0.011          | 3.70E-09 | 1.14E-05 | 4.68         |
| rs112308555 | T             | A                  | 0.034                      | -0.142                                     | 0.022          | 2.60E-08 | 1.14E-05 | 4.68         |
| rs12669521  | A             | G                  | 0.340                      | 0.055                                      | 0.011          | 4.50E-09 | 1.14E-05 | 4.66         |
| rs140395138 | G             | T                  | 0.028                      | -0.153                                     | 0.022          | 6.30E-09 | 1.14E-05 | 4.65         |
| rs7071922   | C             | G                  | 0.265                      | 0.055                                      | 0.011          | 4.50E-09 | 1.13E-05 | 4.62         |
| rs10886014  | C             | T                  | 0.490                      | 0.055                                      | 0.011          | 4.60E-09 | 1.13E-05 | 4.62         |
| rs727405    | G             | A                  | 0.481                      | 0.055                                      | 0.011          | 5.60E-09 | 1.12E-05 | 4.57         |
| rs7727635   | G             | T                  | 0.152                      | 0.077                                      | 0.011          | 6.00E-09 | 1.11E-05 | 4.55         |
| rs11878545  | G             | T                  | 0.150                      | -0.077                                     | 0.011          | 7.50E-09 | 1.11E-05 | 4.54         |
| rs13300763  | G             | C                  | 0.147                      | -0.077                                     | 0.011          | 1.00E-08 | 1.10E-05 | 4.50         |
| rs1121980   | G             | A                  | 0.421                      | -0.055                                     | 0.011          | 7.10E-09 | 1.10E-05 | 4.49         |
| rs2973342   | A             | G                  | 0.251                      | -0.055                                     | 0.011          | 8.40E-09 | 1.09E-05 | 4.47         |
| rs1983128   | G             | A                  | 0.323                      | -0.055                                     | 0.011          | 1.70E-08 | 1.09E-05 | 4.46         |
| rs12445820  | C             | G                  | 0.148                      | 0.077                                      | 0.011          | 8.70E-09 | 1.09E-05 | 4.45         |
| rs72790097  | T             | C                  | 0.032                      | -0.142                                     | 0.022          | 2.20E-08 | 1.09E-05 | 4.45         |
| rs231360    | C             | T                  | 0.392                      | -0.055                                     | 0.011          | 9.30E-09 | 1.09E-05 | 4.45         |
| rs35537689  | G             | GA                 | 0.307                      | -0.055                                     | 0.011          | 1.00E-08 | 1.08E-05 | 4.42         |
| rs3743380   | G             | C                  | 0.384                      | -0.055                                     | 0.011          | 1.20E-08 | 1.08E-05 | 4.41         |

| SNP                    | Effect allele | Alternative allele | Frequency of effect allele | $\beta$ -coefficient with HbA1c (mmol/mol) |                |           | R2       | F-statistics |
|------------------------|---------------|--------------------|----------------------------|--------------------------------------------|----------------|-----------|----------|--------------|
|                        |               |                    |                            | $\beta$ -coefficient                       | Standard error | P-value   |          |              |
| rs7222963              | G             | C                  | 0.066                      | 0.098                                      | 0.022          | 9.70E-09  | 1.08E-05 | 4.41         |
| rs1508615              | T             | C                  | 0.486                      | 0.055                                      | 0.011          | 1.00E-08  | 1.08E-05 | 4.40         |
| rs3784634              | C             | T                  | 0.437                      | 0.055                                      | 0.011          | 1.00E-08  | 1.08E-05 | 4.40         |
| rs76992245             | C             | G                  | 0.093                      | 0.087                                      | 0.011          | 2.20E-08  | 1.07E-05 | 4.37         |
| rs1866476              | T             | C                  | 0.268                      | 0.055                                      | 0.011          | 1.20E-08  | 1.07E-05 | 4.37         |
| rs112484505            | G             | A                  | 0.020                      | 0.175                                      | 0.033          | 2.80E-08  | 1.06E-05 | 4.35         |
| rs35039467             | G             | C                  | 0.117                      | 0.077                                      | 0.011          | 2.40E-08  | 1.06E-05 | 4.33         |
| rs73368485             | G             | T                  | 0.079                      | -0.087                                     | 0.011          | 1.30E-08  | 1.06E-05 | 4.32         |
| rs10998831             | G             | A                  | 0.009                      | -0.262                                     | 0.044          | 2.70E-08  | 1.05E-05 | 4.31         |
| rs34592828             | G             | A                  | 0.045                      | 0.120                                      | 0.022          | 1.70E-08  | 1.04E-05 | 4.26         |
| rs6953344              | A             | G                  | 0.246                      | -0.055                                     | 0.011          | 1.90E-08  | 1.04E-05 | 4.25         |
| rs145016347            | T             | C                  | 0.031                      | -0.142                                     | 0.022          | 3.30E-08  | 1.04E-05 | 4.24         |
| rs35024453             | C             | CT                 | 0.139                      | -0.077                                     | 0.011          | 2.20E-08  | 1.03E-05 | 4.23         |
| rs34865291             | A             | G                  | 0.059                      | -0.109                                     | 0.022          | 4.20E-08  | 1.03E-05 | 4.22         |
| rs10087219             | G             | A                  | 0.102                      | -0.077                                     | 0.011          | 2.90E-08  | 1.02E-05 | 4.16         |
| rs532854               | G             | C                  | 0.310                      | 0.055                                      | 0.011          | 2.50E-08  | 1.02E-05 | 4.16         |
| rs373130596            | CTAT          | C                  | 0.039                      | 0.131                                      | 0.022          | 3.70E-08  | 1.01E-05 | 4.11         |
| rs7197746              | A             | T                  | 0.094                      | 0.087                                      | 0.011          | 3.20E-08  | 1.00E-05 | 4.11         |
| rs10908278             | T             | A                  | 0.485                      | 0.044                                      | 0.011          | 3.70E-08  | 1.00E-05 | 4.10         |
| rs28483956             | G             | A                  | 0.045                      | -0.120                                     | 0.022          | 3.60E-08  | 9.98E-06 | 4.08         |
| rs3948593              | T             | C                  | 0.163                      | 0.066                                      | 0.011          | 4.70E-08  | 9.97E-06 | 4.08         |
| rs4279506              | G             | C                  | 0.374                      | 0.055                                      | 0.011          | 4.70E-08  | 9.92E-06 | 4.06         |
| rs17122779             | A             | G                  | 0.229                      | -0.055                                     | 0.011          | 4.50E-08  | 9.78E-06 | 4.00         |
| Erythrocytic variants: |               |                    |                            |                                            |                |           |          |              |
| rs5030918              | A             | C                  | 0.026                      | 1.191                                      | 0.033          | 0.00E+00  | 6.12E-04 | 250.29       |
| rs150705486            | G             | A                  | 0.016                      | 1.191                                      | 0.033          | 6.20E-231 | 3.67E-04 | 150.26       |
| rs2748424              | C             | G                  | 0.189                      | -0.372                                     | 0.011          | 6.20E-232 | 3.53E-04 | 144.34       |
| rs113373052            | C             | T                  | 0.313                      | -0.306                                     | 0.011          | 9.00E-229 | 3.42E-04 | 140.07       |

| SNP         | Effect allele | Alternative allele | Frequency of effect allele | $\beta$ -coefficient with HbA1c (mmol/mol) |                |           | R2       | F-statistics |
|-------------|---------------|--------------------|----------------------------|--------------------------------------------|----------------|-----------|----------|--------------|
|             |               |                    |                            | $\beta$ -coefficient                       | Standard error | P-value   |          |              |
| rs79220007  | T             | C                  | 0.077                      | 0.536                                      | 0.022          | 2.80E-227 | 3.40E-04 | 139.05       |
| rs857725    | T             | G                  | 0.266                      | -0.317                                     | 0.011          | 5.70E-222 | 3.31E-04 | 135.30       |
| rs4737010   | G             | A                  | 0.228                      | -0.328                                     | 0.011          | 2.10E-217 | 3.26E-04 | 133.36       |
| rs200589393 | CT            | C                  | 0.421                      | 0.273                                      | 0.011          | 9.30E-201 | 3.08E-04 | 126.10       |
| rs855791    | A             | G                  | 0.439                      | 0.262                                      | 0.011          | 1.40E-191 | 2.87E-04 | 117.60       |
| rs12819124  | C             | A                  | 0.473                      | 0.251                                      | 0.011          | 2.20E-174 | 2.61E-04 | 106.77       |
| rs551118    | C             | G                  | 0.422                      | -0.240                                     | 0.011          | 6.70E-150 | 2.30E-04 | 94.17        |
| rs198851    | T             | G                  | 0.151                      | -0.328                                     | 0.011          | 8.80E-154 | 2.29E-04 | 93.53        |
| rs34265667  | G             | A                  | 0.035                      | 0.623                                      | 0.022          | 6.40E-146 | 2.17E-04 | 88.89        |
| rs9299503   | G             | A                  | 0.488                      | -0.230                                     | 0.011          | 2.10E-125 | 2.14E-04 | 87.43        |
| rs1849134   | A             | T                  | 0.305                      | 0.230                                      | 0.011          | 2.20E-120 | 1.79E-04 | 73.14        |
| rs61750929  | C             | T                  | 0.055                      | 0.415                                      | 0.022          | 2.00E-101 | 1.50E-04 | 61.52        |
| rs35365035  | T             | C                  | 0.392                      | -0.186                                     | 0.011          | 1.20E-95  | 1.41E-04 | 57.64        |
| rs13266634  | C             | T                  | 0.313                      | 0.197                                      | 0.011          | 2.10E-91  | 1.35E-04 | 55.10        |
| rs12876143  | T             | C                  | 0.089                      | -0.317                                     | 0.011          | 1.30E-90  | 1.34E-04 | 54.68        |
| rs76895963  | T             | G                  | 0.021                      | 0.612                                      | 0.033          | 1.20E-73  | 1.31E-04 | 53.55        |
| rs11735662  | C             | T                  | 0.034                      | 0.459                                      | 0.022          | 9.50E-80  | 1.17E-04 | 47.81        |
| rs635634    | C             | T                  | 0.185                      | -0.208                                     | 0.011          | 2.30E-72  | 1.07E-04 | 43.73        |
| rs453922    | T             | C                  | 0.275                      | -0.175                                     | 0.011          | 1.60E-68  | 1.06E-04 | 43.42        |
| rs11438979  | A             | AG                 | 0.419                      | 0.164                                      | 0.011          | 1.10E-70  | 1.04E-04 | 42.54        |
| rs10823340  | C             | T                  | 0.249                      | -0.175                                     | 0.011          | 7.60E-67  | 9.79E-05 | 40.06        |
| rs371973771 | G             | A                  | 0.130                      | -0.230                                     | 0.011          | 2.70E-65  | 9.75E-05 | 39.86        |
| rs9389268   | A             | G                  | 0.260                      | 0.175                                      | 0.011          | 6.00E-63  | 9.25E-05 | 37.85        |
| rs11530658  | A             | G                  | 0.100                      | 0.240                                      | 0.011          | 2.30E-60  | 8.84E-05 | 36.17        |
| rs6602913   | A             | C                  | 0.367                      | -0.142                                     | 0.011          | 1.10E-56  | 8.29E-05 | 33.90        |
| rs1175550   | A             | G                  | 0.231                      | 0.164                                      | 0.011          | 1.30E-52  | 7.86E-05 | 32.13        |
| rs112694524 | G             | A                  | 0.073                      | 0.251                                      | 0.022          | 1.00E-48  | 7.30E-05 | 29.86        |
| rs56267269  | C             | T                  | 0.411                      | 0.131                                      | 0.011          | 2.90E-50  | 7.28E-05 | 29.78        |

| SNP         | Effect allele | Alternative allele | Frequency of effect allele | $\beta$ -coefficient with HbA1c (mmol/mol) |                |          | R2       | F-statistics |
|-------------|---------------|--------------------|----------------------------|--------------------------------------------|----------------|----------|----------|--------------|
|             |               |                    |                            | $\beta$ -coefficient                       | Standard error | P-value  |          |              |
| rs78565860  | T             | C                  | 0.047                      | 0.306                                      | 0.022          | 1.70E-49 | 7.17E-05 | 29.32        |
| rs9269095   | G             | A                  | 0.301                      | -0.142                                     | 0.011          | 3.80E-43 | 7.12E-05 | 29.12        |
| rs7137828   | C             | T                  | 0.482                      | -0.131                                     | 0.011          | 1.00E-48 | 7.08E-05 | 28.97        |
| rs112100783 | G             | A                  | 0.034                      | 0.350                                      | 0.022          | 3.00E-45 | 6.82E-05 | 27.88        |
| rs34552339  | A             | AG                 | 0.351                      | 0.131                                      | 0.011          | 7.80E-47 | 6.77E-05 | 27.69        |
| rs7224870   | A             | G                  | 0.203                      | 0.153                                      | 0.011          | 3.50E-46 | 6.65E-05 | 27.21        |
| rs369333540 | C             | CGGGA              | 0.174                      | 0.164                                      | 0.011          | 3.90E-40 | 6.41E-05 | 26.21        |
| rs4758633   | A             | G                  | 0.456                      | -0.120                                     | 0.011          | 3.90E-44 | 6.38E-05 | 26.10        |
| rs1642762   | C             | T                  | 0.437                      | 0.120                                      | 0.011          | 6.20E-43 | 6.27E-05 | 25.66        |
| rs7451008   | T             | C                  | 0.261                      | -0.142                                     | 0.011          | 2.30E-42 | 6.13E-05 | 25.09        |
| rs144658542 | A             | AT                 | 0.199                      | -0.153                                     | 0.011          | 6.50E-41 | 5.86E-05 | 23.97        |
| rs28505677  | C             | G                  | 0.237                      | 0.142                                      | 0.011          | 3.00E-39 | 5.71E-05 | 23.36        |
| rs6014993   | A             | G                  | 0.487                      | -0.120                                     | 0.011          | 1.90E-39 | 5.69E-05 | 23.29        |
| rs12667932  | G             | A                  | 0.080                      | 0.219                                      | 0.011          | 3.10E-39 | 5.64E-05 | 23.06        |
| rs340882    | C             | G                  | 0.379                      | -0.120                                     | 0.011          | 2.30E-38 | 5.55E-05 | 22.71        |
| rs75372982  | A             | G                  | 0.287                      | 0.131                                      | 0.011          | 3.00E-37 | 5.47E-05 | 22.36        |
| rs6808166   | G             | A                  | 0.426                      | -0.109                                     | 0.011          | 4.50E-37 | 5.34E-05 | 21.84        |
| rs11655029  | T             | C                  | 0.305                      | 0.120                                      | 0.011          | 5.20E-37 | 5.33E-05 | 21.82        |
| rs1967604   | A             | G                  | 0.287                      | 0.120                                      | 0.011          | 7.10E-37 | 5.31E-05 | 21.70        |
| rs12771121  | C             | T                  | 0.207                      | -0.142                                     | 0.011          | 1.60E-35 | 5.19E-05 | 21.24        |
| rs429961    | T             | A                  | 0.184                      | 0.142                                      | 0.011          | 4.30E-35 | 5.17E-05 | 21.14        |
| rs115340137 | T             | C                  | 0.009                      | 0.590                                      | 0.044          | 5.40E-36 | 5.14E-05 | 21.03        |
| rs2143918   | A             | C                  | 0.471                      | 0.109                                      | 0.011          | 7.30E-36 | 5.14E-05 | 21.00        |
| rs9872660   | G             | T                  | 0.166                      | -0.153                                     | 0.011          | 4.70E-35 | 5.12E-05 | 20.93        |
| rs9258357   | T             | C                  | 0.164                      | -0.142                                     | 0.011          | 1.40E-34 | 4.92E-05 | 20.14        |
| rs3132513   | A             | G                  | 0.439                      | -0.109                                     | 0.011          | 7.70E-34 | 4.80E-05 | 19.64        |
| rs34417262  | G             | A                  | 0.191                      | -0.131                                     | 0.011          | 1.40E-33 | 4.80E-05 | 19.61        |
| rs78588343  | G             | A                  | 0.180                      | 0.142                                      | 0.011          | 9.50E-33 | 4.66E-05 | 19.07        |

| SNP         | Effect allele | Alternative allele | Frequency of effect allele | $\beta$ -coefficient with HbA1c (mmol/mol) |                |          | R2       | F-statistics |
|-------------|---------------|--------------------|----------------------------|--------------------------------------------|----------------|----------|----------|--------------|
|             |               |                    |                            | $\beta$ -coefficient                       | Standard error | P-value  |          |              |
| rs112802399 | G             | T                  | 0.033                      | 0.295                                      | 0.022          | 2.10E-32 | 4.60E-05 | 18.81        |
| rs12341913  | A             | T                  | 0.122                      | -0.153                                     | 0.011          | 2.80E-22 | 4.45E-05 | 18.22        |
| rs174557    | A             | G                  | 0.310                      | 0.109                                      | 0.011          | 4.50E-31 | 4.39E-05 | 17.97        |
| rs73396237  | C             | G                  | 0.148                      | 0.142                                      | 0.011          | 1.20E-30 | 4.33E-05 | 17.72        |
| rs10840425  | A             | C                  | 0.415                      | 0.098                                      | 0.011          | 1.50E-30 | 4.33E-05 | 17.71        |
| rs12941965  | A             | C                  | 0.223                      | 0.120                                      | 0.011          | 3.70E-30 | 4.28E-05 | 17.52        |
| rs2285005   | G             | A                  | 0.340                      | -0.109                                     | 0.011          | 1.20E-29 | 4.19E-05 | 17.14        |
| rs112601576 | C             | T                  | 0.248                      | -0.120                                     | 0.011          | 1.30E-28 | 4.16E-05 | 17.01        |
| rs3811444   | C             | T                  | 0.333                      | -0.109                                     | 0.011          | 3.50E-29 | 4.11E-05 | 16.80        |
| rs8050500   | T             | C                  | 0.446                      | 0.098                                      | 0.011          | 1.40E-28 | 4.03E-05 | 16.47        |
| rs247826    | C             | T                  | 0.223                      | -0.120                                     | 0.011          | 5.90E-28 | 3.97E-05 | 16.22        |
| rs13215994  | C             | T                  | 0.281                      | 0.109                                      | 0.011          | 2.10E-27 | 3.86E-05 | 15.79        |
| rs1894474   | A             | G                  | 0.481                      | 0.098                                      | 0.011          | 7.20E-27 | 3.80E-05 | 15.53        |
| rs59168150  | C             | T                  | 0.288                      | -0.109                                     | 0.011          | 1.30E-16 | 3.79E-05 | 15.51        |
| rs2375279   | T             | C                  | 0.151                      | 0.131                                      | 0.011          | 8.70E-27 | 3.77E-05 | 15.42        |
| rs12921546  | G             | A                  | 0.282                      | -0.109                                     | 0.011          | 1.30E-26 | 3.74E-05 | 15.31        |
| rs2858010   | T             | C                  | 0.340                      | 0.098                                      | 0.011          | 2.10E-26 | 3.73E-05 | 15.25        |
| rs60757417  | C             | G                  | 0.060                      | -0.197                                     | 0.022          | 6.70E-26 | 3.70E-05 | 15.14        |
| rs28856692  | G             | A                  | 0.444                      | -0.098                                     | 0.011          | 8.60E-16 | 3.69E-05 | 15.10        |
| rs79755767  | G             | A                  | 0.100                      | 0.153                                      | 0.011          | 8.30E-26 | 3.68E-05 | 15.03        |
| rs267738    | T             | G                  | 0.221                      | 0.109                                      | 0.011          | 1.60E-25 | 3.57E-05 | 14.62        |
| rs2954021   | A             | G                  | 0.494                      | -0.087                                     | 0.011          | 2.30E-25 | 3.55E-05 | 14.53        |
| rs72811487  | G             | A                  | 0.035                      | 0.251                                      | 0.022          | 3.00E-25 | 3.52E-05 | 14.41        |
| rs10901252  | G             | C                  | 0.060                      | 0.197                                      | 0.022          | 5.90E-25 | 3.51E-05 | 14.34        |
| rs2060779   | G             | A                  | 0.222                      | 0.109                                      | 0.011          | 5.80E-25 | 3.50E-05 | 14.33        |
| rs72939920  | A             | T                  | 0.235                      | 0.109                                      | 0.011          | 1.90E-24 | 3.43E-05 | 14.04        |
| rs7732130   | G             | A                  | 0.319                      | 0.098                                      | 0.011          | 2.50E-24 | 3.40E-05 | 13.90        |
| rs155766    | C             | T                  | 0.366                      | 0.098                                      | 0.011          | 3.00E-18 | 3.37E-05 | 13.77        |

| SNP         | Effect allele | Alternative allele | Frequency of effect allele | $\beta$ -coefficient with HbA1c (mmol/mol) |                |          | R2       | F-statistics |
|-------------|---------------|--------------------|----------------------------|--------------------------------------------|----------------|----------|----------|--------------|
|             |               |                    |                            | $\beta$ -coefficient                       | Standard error | P-value  |          |              |
| rs79046494  | G             | A                  | 0.343                      | -0.098                                     | 0.011          | 7.00E-24 | 3.33E-05 | 13.62        |
| rs9994509   | A             | G                  | 0.392                      | 0.087                                      | 0.011          | 1.70E-23 | 3.29E-05 | 13.44        |
| rs11235688  | G             | A                  | 0.416                      | 0.087                                      | 0.011          | 1.80E-23 | 3.28E-05 | 13.42        |
| rs4791641   | C             | T                  | 0.495                      | 0.087                                      | 0.011          | 2.00E-23 | 3.26E-05 | 13.33        |
| rs59153558  | A             | G                  | 0.280                      | -0.098                                     | 0.011          | 4.50E-23 | 3.22E-05 | 13.15        |
| rs10501320  | G             | C                  | 0.265                      | 0.098                                      | 0.011          | 4.20E-23 | 3.21E-05 | 13.14        |
| rs12607898  | A             | G                  | 0.254                      | -0.098                                     | 0.011          | 5.30E-23 | 3.21E-05 | 13.11        |
| rs13434265  | C             | T                  | 0.416                      | 0.087                                      | 0.011          | 8.60E-23 | 3.19E-05 | 13.04        |
| rs117370443 | T             | C                  | 0.039                      | -0.219                                     | 0.022          | 1.00E-22 | 3.17E-05 | 12.96        |
| rs6055955   | C             | T                  | 0.493                      | 0.087                                      | 0.011          | 1.10E-22 | 3.16E-05 | 12.90        |
| rs13167071  | G             | C                  | 0.360                      | -0.087                                     | 0.011          | 1.30E-22 | 3.15E-05 | 12.86        |
| rs1260334   | C             | A                  | 0.434                      | -0.087                                     | 0.011          | 1.40E-22 | 3.13E-05 | 12.79        |
| rs142621189 | C             | T                  | 0.010                      | -0.437                                     | 0.044          | 3.50E-21 | 3.06E-05 | 12.51        |
| rs11643024  | A             | G                  | 0.308                      | 0.087                                      | 0.011          | 1.40E-21 | 2.99E-05 | 12.22        |
| rs1047912   | C             | T                  | 0.302                      | -0.087                                     | 0.011          | 1.40E-21 | 2.98E-05 | 12.17        |
| rs8110787   | C             | T                  | 0.392                      | 0.087                                      | 0.011          | 1.40E-21 | 2.97E-05 | 12.14        |
| rs41276588  | G             | A                  | 0.286                      | -0.087                                     | 0.011          | 4.20E-21 | 2.95E-05 | 12.07        |
| rs7572278   | T             | A                  | 0.204                      | -0.098                                     | 0.011          | 5.80E-21 | 2.90E-05 | 11.84        |
| rs35188965  | C             | T                  | 0.418                      | -0.087                                     | 0.011          | 1.70E-20 | 2.82E-05 | 11.53        |
| rs71326967  | A             | G                  | 0.344                      | -0.087                                     | 0.011          | 2.90E-20 | 2.82E-05 | 11.51        |
| rs201675920 | T             | TG                 | 0.243                      | -0.098                                     | 0.011          | 8.60E-20 | 2.78E-05 | 11.37        |
| rs34878143  | T             | C                  | 0.024                      | 0.262                                      | 0.033          | 5.10E-20 | 2.78E-05 | 11.36        |
| rs459547    | G             | A                  | 0.291                      | -0.087                                     | 0.011          | 4.00E-20 | 2.78E-05 | 11.36        |
| rs1126930   | G             | C                  | 0.036                      | 0.219                                      | 0.022          | 3.80E-20 | 2.77E-05 | 11.33        |
| rs9270461   | C             | T                  | 0.365                      | -0.087                                     | 0.011          | 7.90E-18 | 2.76E-05 | 11.30        |
| rs6773529   | T             | C                  | 0.169                      | 0.109                                      | 0.011          | 6.00E-20 | 2.76E-05 | 11.29        |
| rs6736362   | C             | T                  | 0.437                      | -0.077                                     | 0.011          | 5.70E-20 | 2.75E-05 | 11.26        |
| rs7036656   | C             | T                  | 0.278                      | -0.087                                     | 0.011          | 6.10E-20 | 2.74E-05 | 11.22        |

| SNP         | Effect allele | Alternative allele | Frequency of effect allele | $\beta$ -coefficient with HbA1c (mmol/mol) |                |          | R2       | F-statistics |
|-------------|---------------|--------------------|----------------------------|--------------------------------------------|----------------|----------|----------|--------------|
|             |               |                    |                            | $\beta$ -coefficient                       | Standard error | P-value  |          |              |
| rs7820334   | C             | T                  | 0.311                      | 0.087                                      | 0.011          | 1.30E-19 | 2.72E-05 | 11.12        |
| rs2572207   | C             | T                  | 0.239                      | -0.098                                     | 0.011          | 8.10E-20 | 2.72E-05 | 11.11        |
| rs17803780  | T             | C                  | 0.212                      | 0.098                                      | 0.011          | 4.30E-19 | 2.62E-05 | 10.71        |
| rs3744222   | C             | T                  | 0.245                      | 0.087                                      | 0.011          | 3.70E-18 | 2.61E-05 | 10.68        |
| rs5995382   | C             | T                  | 0.483                      | -0.077                                     | 0.011          | 1.10E-18 | 2.59E-05 | 10.58        |
| rs183034862 | C             | T                  | 0.025                      | -0.251                                     | 0.033          | 3.30E-17 | 2.51E-05 | 10.28        |
| rs1569780   | A             | C                  | 0.395                      | 0.077                                      | 0.011          | 4.10E-18 | 2.50E-05 | 10.24        |
| rs199737194 | G             | A                  | 0.040                      | -0.197                                     | 0.033          | 4.40E-11 | 2.49E-05 | 10.18        |
| rs7606173   | G             | C                  | 0.432                      | 0.077                                      | 0.011          | 3.50E-18 | 2.47E-05 | 10.12        |
| rs4660342   | T             | G                  | 0.423                      | -0.077                                     | 0.011          | 1.20E-15 | 2.44E-05 | 9.98         |
| rs11545157  | T             | C                  | 0.114                      | 0.120                                      | 0.011          | 7.60E-18 | 2.43E-05 | 9.93         |
| rs941718    | T             | C                  | 0.277                      | -0.087                                     | 0.011          | 3.10E-17 | 2.34E-05 | 9.55         |
| rs74685815  | C             | T                  | 0.028                      | 0.230                                      | 0.033          | 2.50E-16 | 2.32E-05 | 9.48         |
| rs6785881   | C             | T                  | 0.482                      | 0.077                                      | 0.011          | 4.80E-17 | 2.31E-05 | 9.47         |
| rs634454    | T             | G                  | 0.211                      | -0.087                                     | 0.011          | 7.10E-16 | 2.28E-05 | 9.32         |
| rs246232    | C             | G                  | 0.315                      | -0.077                                     | 0.011          | 1.00E-16 | 2.28E-05 | 9.31         |
| rs998584    | C             | A                  | 0.481                      | -0.077                                     | 0.011          | 1.10E-16 | 2.26E-05 | 9.26         |
| rs11614506  | T             | C                  | 0.229                      | 0.087                                      | 0.011          | 8.80E-17 | 2.26E-05 | 9.26         |
| rs2270927   | C             | G                  | 0.094                      | -0.131                                     | 0.011          | 9.00E-17 | 2.26E-05 | 9.25         |
| rs592423    | A             | C                  | 0.446                      | 0.077                                      | 0.011          | 1.20E-16 | 2.25E-05 | 9.19         |
| rs584007    | A             | G                  | 0.357                      | 0.077                                      | 0.011          | 2.10E-16 | 2.23E-05 | 9.10         |
| rs7047279   | T             | C                  | 0.432                      | 0.077                                      | 0.011          | 3.00E-16 | 2.21E-05 | 9.04         |
| rs7546390   | T             | C                  | 0.095                      | -0.120                                     | 0.011          | 9.50E-16 | 2.17E-05 | 8.88         |
| rs11043299  | T             | C                  | 0.376                      | -0.077                                     | 0.011          | 5.60E-14 | 2.14E-05 | 8.75         |
| rs11851199  | A             | G                  | 0.073                      | 0.142                                      | 0.022          | 1.00E-15 | 2.14E-05 | 8.74         |
| rs2041601   | G             | C                  | 0.091                      | -0.120                                     | 0.011          | 8.60E-16 | 2.13E-05 | 8.70         |
| rs192095068 | G             | A                  | 0.171                      | 0.098                                      | 0.011          | 4.20E-15 | 2.09E-05 | 8.54         |
| rs181124493 | C             | T                  | 0.022                      | -0.240                                     | 0.033          | 3.20E-15 | 2.09E-05 | 8.54         |

| SNP         | Effect allele | Alternative allele | Frequency of effect allele | $\beta$ -coefficient with HbA1c (mmol/mol) |                |          | R2       | F-statistics |
|-------------|---------------|--------------------|----------------------------|--------------------------------------------|----------------|----------|----------|--------------|
|             |               |                    |                            | $\beta$ -coefficient                       | Standard error | P-value  |          |              |
| rs2060985   | A             | G                  | 0.463                      | 0.066                                      | 0.011          | 1.40E-15 | 2.09E-05 | 8.54         |
| rs7720275   | T             | C                  | 0.170                      | -0.098                                     | 0.011          | 1.90E-15 | 2.07E-05 | 8.47         |
| rs7747023   | A             | G                  | 0.159                      | -0.098                                     | 0.011          | 2.30E-15 | 2.05E-05 | 8.40         |
| rs2005079   | G             | A                  | 0.335                      | -0.077                                     | 0.011          | 3.50E-15 | 2.03E-05 | 8.31         |
| rs117826678 | A             | G                  | 0.037                      | 0.186                                      | 0.022          | 1.30E-13 | 2.03E-05 | 8.30         |
| rs7309882   | G             | T                  | 0.370                      | 0.077                                      | 0.011          | 1.20E-14 | 2.02E-05 | 8.26         |
| rs3780962   | A             | G                  | 0.467                      | -0.066                                     | 0.011          | 5.80E-15 | 2.01E-05 | 8.22         |
| rs13063578  | T             | A                  | 0.399                      | -0.066                                     | 0.011          | 5.20E-15 | 2.01E-05 | 8.21         |
| rs115806594 | C             | A                  | 0.016                      | 0.273                                      | 0.033          | 6.10E-14 | 2.00E-05 | 8.17         |
| rs9324022   | T             | C                  | 0.209                      | -0.087                                     | 0.011          | 3.90E-14 | 1.96E-05 | 8.04         |
| rs34221578  | C             | T                  | 0.077                      | -0.131                                     | 0.022          | 2.40E-14 | 1.94E-05 | 7.94         |
| rs9389212   | A             | G                  | 0.209                      | -0.087                                     | 0.011          | 1.50E-14 | 1.94E-05 | 7.93         |
| rs4665710   | A             | C                  | 0.206                      | 0.087                                      | 0.011          | 1.50E-14 | 1.94E-05 | 7.92         |
| rs9264277   | T             | C                  | 0.368                      | -0.066                                     | 0.011          | 1.90E-14 | 1.94E-05 | 7.92         |
| rs117305036 | G             | A                  | 0.056                      | 0.153                                      | 0.022          | 2.80E-13 | 1.92E-05 | 7.86         |
| rs6937957   | T             | C                  | 0.195                      | -0.087                                     | 0.011          | 2.40E-14 | 1.91E-05 | 7.79         |
| rs111631066 | G             | A                  | 0.016                      | 0.273                                      | 0.033          | 1.60E-13 | 1.90E-05 | 7.79         |
| rs11658587  | C             | T                  | 0.037                      | 0.175                                      | 0.022          | 4.00E-14 | 1.87E-05 | 7.63         |
| rs35979828  | C             | T                  | 0.069                      | 0.131                                      | 0.022          | 4.80E-14 | 1.86E-05 | 7.59         |
| rs12743834  | T             | C                  | 0.397                      | -0.066                                     | 0.011          | 6.70E-14 | 1.84E-05 | 7.52         |
| rs12531645  | G             | A                  | 0.284                      | -0.077                                     | 0.011          | 6.70E-14 | 1.84E-05 | 7.52         |
| rs1570360   | A             | G                  | 0.329                      | -0.066                                     | 0.011          | 7.40E-14 | 1.83E-05 | 7.50         |
| rs79985479  | C             | A                  | 0.173                      | 0.087                                      | 0.011          | 5.00E-12 | 1.80E-05 | 7.37         |
| rs2737263   | G             | T                  | 0.285                      | 0.077                                      | 0.011          | 2.10E-13 | 1.77E-05 | 7.24         |
| rs17531978  | T             | C                  | 0.129                      | -0.098                                     | 0.011          | 2.30E-13 | 1.76E-05 | 7.21         |
| rs4480845   | T             | C                  | 0.359                      | 0.066                                      | 0.011          | 3.30E-13 | 1.76E-05 | 7.20         |
| rs1416218   | C             | G                  | 0.472                      | -0.066                                     | 0.011          | 3.30E-13 | 1.75E-05 | 7.15         |
| rs117351529 | T             | C                  | 0.082                      | -0.120                                     | 0.011          | 3.70E-13 | 1.75E-05 | 7.14         |



| SNP         | Effect allele | Alternative allele | Frequency of effect allele | $\beta$ -coefficient with HbA1c (mmol/mol) |                |          | R2       | F-statistics |
|-------------|---------------|--------------------|----------------------------|--------------------------------------------|----------------|----------|----------|--------------|
|             |               |                    |                            | $\beta$ -coefficient                       | Standard error | P-value  |          |              |
| rs374841001 | T             | TA                 | 0.316                      | -0.066                                     | 0.011          | 4.60E-13 | 1.75E-05 | 7.14         |
| rs60968356  | T             | C                  | 0.049                      | -0.153                                     | 0.022          | 2.80E-12 | 1.73E-05 | 7.08         |
| rs10421794  | T             | C                  | 0.402                      | -0.066                                     | 0.011          | 3.90E-13 | 1.73E-05 | 7.06         |
| rs11237477  | A             | T                  | 0.158                      | 0.087                                      | 0.011          | 4.30E-13 | 1.72E-05 | 7.02         |
| rs12925612  | G             | C                  | 0.012                      | -0.295                                     | 0.044          | 2.80E-12 | 1.71E-05 | 6.98         |
| rs4411786   | T             | C                  | 0.262                      | 0.077                                      | 0.011          | 7.30E-13 | 1.69E-05 | 6.92         |
| rs17462893  | A             | G                  | 0.101                      | -0.109                                     | 0.011          | 7.80E-13 | 1.68E-05 | 6.89         |
| rs701848    | T             | C                  | 0.390                      | 0.066                                      | 0.011          | 1.10E-12 | 1.67E-05 | 6.83         |
| rs12096473  | C             | T                  | 0.070                      | 0.120                                      | 0.022          | 1.80E-12 | 1.64E-05 | 6.72         |
| rs10752943  | C             | T                  | 0.432                      | 0.066                                      | 0.011          | 1.90E-12 | 1.63E-05 | 6.66         |
| rs56271783  | G             | C                  | 0.045                      | -0.153                                     | 0.022          | 3.20E-12 | 1.62E-05 | 6.63         |
| rs116248380 | C             | T                  | 0.021                      | -0.219                                     | 0.033          | 2.30E-12 | 1.61E-05 | 6.58         |
| rs12525479  | G             | A                  | 0.063                      | -0.131                                     | 0.022          | 3.10E-12 | 1.60E-05 | 6.56         |
| rs11844552  | A             | G                  | 0.024                      | 0.208                                      | 0.033          | 3.60E-12 | 1.60E-05 | 6.55         |
| rs141820703 | T             | C                  | 0.017                      | -0.240                                     | 0.033          | 1.20E-11 | 1.60E-05 | 6.54         |
| rs9824251   | C             | T                  | 0.136                      | -0.087                                     | 0.011          | 3.40E-12 | 1.59E-05 | 6.52         |
| rs9468693   | T             | C                  | 0.071                      | -0.120                                     | 0.022          | 3.40E-12 | 1.59E-05 | 6.49         |
| rs76498834  | C             | T                  | 0.045                      | -0.153                                     | 0.022          | 4.10E-12 | 1.58E-05 | 6.45         |
| rs73564493  | G             | A                  | 0.072                      | 0.120                                      | 0.022          | 4.40E-12 | 1.57E-05 | 6.43         |
| rs117311034 | G             | T                  | 0.096                      | -0.098                                     | 0.011          | 7.20E-12 | 1.56E-05 | 6.39         |
| rs150848796 | G             | T                  | 0.022                      | 0.208                                      | 0.033          | 2.00E-11 | 1.55E-05 | 6.35         |
| rs351978    | A             | G                  | 0.419                      | 0.066                                      | 0.011          | 1.20E-11 | 1.55E-05 | 6.35         |
| rs6598047   | T             | C                  | 0.231                      | 0.077                                      | 0.011          | 3.80E-09 | 1.55E-05 | 6.33         |
| rs12878001  | T             | G                  | 0.160                      | -0.087                                     | 0.011          | 9.10E-12 | 1.53E-05 | 6.26         |
| rs11557154  | C             | T                  | 0.127                      | 0.087                                      | 0.011          | 1.00E-11 | 1.52E-05 | 6.20         |
| rs73210702  | G             | A                  | 0.036                      | -0.164                                     | 0.022          | 2.10E-11 | 1.50E-05 | 6.14         |
| rs10923372  | T             | C                  | 0.246                      | 0.066                                      | 0.011          | 1.50E-11 | 1.50E-05 | 6.13         |
| rs6719549   | G             | A                  | 0.192                      | 0.077                                      | 0.011          | 2.40E-11 | 1.49E-05 | 6.10         |

| SNP         | Effect allele | Alternative allele | Frequency of effect allele | $\beta$ -coefficient with HbA1c (mmol/mol) |                |          | R2       | F-statistics |
|-------------|---------------|--------------------|----------------------------|--------------------------------------------|----------------|----------|----------|--------------|
|             |               |                    |                            | $\beta$ -coefficient                       | Standard error | P-value  |          |              |
| rs2608073   | C             | T                  | 0.084                      | 0.109                                      | 0.022          | 7.90E-11 | 1.49E-05 | 6.08         |
| rs36110254  | C             | CA                 | 0.283                      | -0.066                                     | 0.011          | 1.60E-11 | 1.49E-05 | 6.08         |
| rs72688461  | G             | T                  | 0.326                      | 0.066                                      | 0.011          | 4.60E-11 | 1.48E-05 | 6.04         |
| rs299646    | G             | C                  | 0.422                      | 0.055                                      | 0.011          | 2.00E-11 | 1.47E-05 | 6.02         |
| rs36084354  | G             | A                  | 0.093                      | 0.098                                      | 0.011          | 2.10E-11 | 1.47E-05 | 6.01         |
| rs2879904   | C             | T                  | 0.122                      | 0.087                                      | 0.011          | 4.00E-10 | 1.46E-05 | 5.96         |
| rs75475570  | G             | A                  | 0.182                      | 0.077                                      | 0.011          | 2.90E-11 | 1.46E-05 | 5.95         |
| rs1354034   | T             | C                  | 0.399                      | -0.066                                     | 0.011          | 2.70E-11 | 1.45E-05 | 5.93         |
| rs113349196 | A             | G                  | 0.107                      | -0.098                                     | 0.011          | 5.40E-11 | 1.44E-05 | 5.90         |
| rs1399627   | A             | G                  | 0.348                      | -0.066                                     | 0.011          | 3.70E-11 | 1.44E-05 | 5.88         |
| rs12107581  | C             | T                  | 0.344                      | 0.066                                      | 0.011          | 4.50E-11 | 1.42E-05 | 5.82         |
| rs34302523  | C             | A                  | 0.434                      | -0.055                                     | 0.011          | 4.50E-11 | 1.42E-05 | 5.82         |
| rs35133002  | A             | T                  | 0.286                      | 0.066                                      | 0.011          | 4.60E-11 | 1.42E-05 | 5.82         |
| rs4812826   | G             | A                  | 0.306                      | -0.066                                     | 0.011          | 5.00E-11 | 1.42E-05 | 5.81         |
| rs61047863  | G             | A                  | 0.219                      | 0.066                                      | 0.011          | 7.60E-11 | 1.42E-05 | 5.81         |
| rs45607834  | C             | T                  | 0.103                      | -0.098                                     | 0.011          | 5.30E-11 | 1.42E-05 | 5.80         |
| rs151059129 | C             | CA                 | 0.349                      | -0.066                                     | 0.011          | 5.70E-11 | 1.42E-05 | 5.79         |
| rs711244    | C             | T                  | 0.420                      | 0.055                                      | 0.011          | 4.80E-11 | 1.41E-05 | 5.79         |
| rs2026882   | C             | T                  | 0.162                      | 0.077                                      | 0.011          | 5.50E-11 | 1.41E-05 | 5.78         |
| rs2394322   | C             | T                  | 0.336                      | -0.066                                     | 0.011          | 1.80E-10 | 1.38E-05 | 5.65         |
| rs6503492   | T             | A                  | 0.125                      | 0.087                                      | 0.011          | 1.30E-10 | 1.37E-05 | 5.61         |
| rs2641436   | C             | T                  | 0.290                      | 0.066                                      | 0.011          | 1.00E-10 | 1.37E-05 | 5.61         |
| rs12133641  | A             | G                  | 0.410                      | 0.055                                      | 0.011          | 9.40E-11 | 1.37E-05 | 5.61         |
| rs71420477  | G             | C                  | 0.019                      | -0.208                                     | 0.033          | 4.40E-10 | 1.37E-05 | 5.61         |
| rs7099229   | G             | A                  | 0.266                      | -0.066                                     | 0.011          | 1.10E-10 | 1.37E-05 | 5.59         |
| rs10222374  | C             | T                  | 0.217                      | -0.066                                     | 0.011          | 1.70E-10 | 1.37E-05 | 5.59         |
| rs34165383  | C             | G                  | 0.096                      | 0.098                                      | 0.011          | 1.40E-10 | 1.37E-05 | 5.58         |
| rs143509164 | C             | CATT               | 0.290                      | -0.066                                     | 0.011          | 3.30E-10 | 1.36E-05 | 5.58         |

| SNP         | Effect allele | Alternative allele | Frequency of effect allele | $\beta$ -coefficient with HbA1c (mmol/mol) |                |          | R2       | F-statistics |
|-------------|---------------|--------------------|----------------------------|--------------------------------------------|----------------|----------|----------|--------------|
|             |               |                    |                            | $\beta$ -coefficient                       | Standard error | P-value  |          |              |
| rs112949644 | T             | C                  | 0.150                      | -0.077                                     | 0.011          | 1.30E-10 | 1.36E-05 | 5.57         |
| rs9787306   | C             | T                  | 0.211                      | 0.066                                      | 0.011          | 1.30E-10 | 1.36E-05 | 5.55         |
| rs10092989  | G             | T                  | 0.164                      | -0.077                                     | 0.011          | 2.20E-10 | 1.36E-05 | 5.55         |
| rs9900933   | T             | C                  | 0.343                      | 0.055                                      | 0.011          | 1.40E-10 | 1.36E-05 | 5.55         |
| rs1476171   | T             | C                  | 0.234                      | -0.066                                     | 0.011          | 1.40E-10 | 1.35E-05 | 5.54         |
| rs755249    | C             | T                  | 0.233                      | -0.066                                     | 0.011          | 1.40E-10 | 1.35E-05 | 5.52         |
| rs8176059   | G             | A                  | 0.011                      | 0.273                                      | 0.044          | 1.40E-10 | 1.35E-05 | 5.52         |
| rs75866363  | G             | A                  | 0.072                      | 0.109                                      | 0.022          | 1.50E-10 | 1.35E-05 | 5.50         |
| rs551720    | A             | T                  | 0.367                      | -0.055                                     | 0.011          | 2.00E-10 | 1.34E-05 | 5.49         |
| rs1891058   | G             | A                  | 0.394                      | -0.055                                     | 0.011          | 2.10E-10 | 1.33E-05 | 5.45         |
| rs12992076  | T             | C                  | 0.102                      | 0.098                                      | 0.011          | 2.90E-10 | 1.33E-05 | 5.45         |
| rs909134    | T             | C                  | 0.316                      | 0.066                                      | 0.011          | 2.00E-10 | 1.32E-05 | 5.41         |
| rs9423289   | C             | T                  | 0.423                      | -0.055                                     | 0.011          | 2.20E-10 | 1.32E-05 | 5.40         |
| rs147428040 | G             | A                  | 0.043                      | -0.142                                     | 0.022          | 1.60E-09 | 1.32E-05 | 5.39         |
| rs6922503   | C             | T                  | 0.277                      | 0.066                                      | 0.011          | 2.40E-10 | 1.32E-05 | 5.39         |
| rs836468    | T             | A                  | 0.310                      | 0.066                                      | 0.011          | 2.20E-10 | 1.32E-05 | 5.39         |
| rs2294856   | G             | C                  | 0.355                      | -0.055                                     | 0.011          | 2.10E-10 | 1.32E-05 | 5.38         |
| rs117071905 | G             | A                  | 0.010                      | -0.273                                     | 0.044          | 5.10E-10 | 1.31E-05 | 5.37         |
| rs6087995   | A             | C                  | 0.452                      | -0.055                                     | 0.011          | 3.30E-10 | 1.30E-05 | 5.32         |
| rs157227    | A             | G                  | 0.370                      | 0.055                                      | 0.011          | 3.10E-10 | 1.30E-05 | 5.32         |
| rs2867932   | A             | G                  | 0.398                      | -0.055                                     | 0.011          | 3.40E-10 | 1.29E-05 | 5.29         |
| rs706848    | G             | A                  | 0.439                      | -0.055                                     | 0.011          | 3.80E-10 | 1.29E-05 | 5.26         |
| rs6073967   | C             | T                  | 0.332                      | 0.055                                      | 0.011          | 4.30E-10 | 1.28E-05 | 5.22         |
| rs72785418  | G             | C                  | 0.081                      | 0.098                                      | 0.022          | 6.60E-10 | 1.28E-05 | 5.22         |
| rs9314323   | A             | G                  | 0.300                      | -0.066                                     | 0.011          | 5.20E-10 | 1.28E-05 | 5.22         |
| rs55938136  | A             | G                  | 0.226                      | 0.066                                      | 0.011          | 4.20E-10 | 1.28E-05 | 5.22         |
| rs12943904  | G             | C                  | 0.306                      | 0.055                                      | 0.011          | 5.60E-10 | 1.27E-05 | 5.18         |
| rs1030097   | C             | G                  | 0.495                      | -0.055                                     | 0.011          | 7.30E-10 | 1.26E-05 | 5.16         |

| SNP             | Effect allele | Alternative allele | Frequency of effect allele | $\beta$ -coefficient with HbA1c (mmol/mol) |                |          | R2       | F-statistics |
|-----------------|---------------|--------------------|----------------------------|--------------------------------------------|----------------|----------|----------|--------------|
|                 |               |                    |                            | $\beta$ -coefficient                       | Standard error | P-value  |          |              |
| rs9701457       | C             | T                  | 0.364                      | 0.055                                      | 0.011          | 6.30E-10 | 1.26E-05 | 5.16         |
| rs56395926      | G             | A                  | 0.229                      | 0.066                                      | 0.011          | 6.70E-10 | 1.26E-05 | 5.14         |
| rs2304234       | T             | C                  | 0.424                      | 0.055                                      | 0.011          | 7.30E-10 | 1.25E-05 | 5.13         |
| rs6063050       | T             | C                  | 0.284                      | 0.066                                      | 0.011          | 7.50E-10 | 1.25E-05 | 5.12         |
| rs488270        | C             | T                  | 0.352                      | -0.055                                     | 0.011          | 6.70E-10 | 1.25E-05 | 5.11         |
| rs12600879      | A             | G                  | 0.382                      | 0.055                                      | 0.011          | 1.30E-09 | 1.25E-05 | 5.11         |
| rs11620577      | C             | T                  | 0.243                      | -0.066                                     | 0.011          | 7.30E-10 | 1.24E-05 | 5.08         |
| rs7220535       | G             | A                  | 0.388                      | 0.055                                      | 0.011          | 9.10E-10 | 1.23E-05 | 5.04         |
| rs62427625      | C             | T                  | 0.136                      | 0.077                                      | 0.011          | 1.60E-09 | 1.22E-05 | 4.97         |
| rs690604        | G             | T                  | 0.081                      | 0.098                                      | 0.022          | 4.90E-09 | 1.22E-05 | 4.97         |
| rs14914283<br>3 | C             | T                  | 0.156                      | -0.077                                     | 0.011          | 1.80E-09 | 1.21E-05 | 4.94         |
| rs75423791      | T             | A                  | 0.055                      | 0.120                                      | 0.022          | 1.70E-09 | 1.20E-05 | 4.92         |
| rs9477866       | A             | G                  | 0.409                      | 0.055                                      | 0.011          | 2.30E-09 | 1.20E-05 | 4.91         |
| rs2934701       | A             | T                  | 0.427                      | 0.055                                      | 0.011          | 1.60E-09 | 1.20E-05 | 4.90         |
| rs73625323      | A             | G                  | 0.136                      | -0.077                                     | 0.011          | 3.20E-09 | 1.20E-05 | 4.90         |
| rs1049654       | A             | C                  | 0.438                      | 0.055                                      | 0.011          | 1.70E-09 | 1.20E-05 | 4.89         |
| rs8045833       | G             | A                  | 0.269                      | -0.055                                     | 0.011          | 1.80E-09 | 1.19E-05 | 4.86         |
| rs6844176       | T             | C                  | 0.456                      | -0.055                                     | 0.011          | 2.30E-09 | 1.18E-05 | 4.85         |
| rs62136856      | A             | G                  | 0.284                      | -0.055                                     | 0.011          | 2.50E-09 | 1.16E-05 | 4.76         |
| rs2736182       | G             | A                  | 0.018                      | -0.197                                     | 0.033          | 2.40E-09 | 1.16E-05 | 4.76         |
| rs3790455       | C             | T                  | 0.344                      | 0.055                                      | 0.011          | 2.70E-09 | 1.16E-05 | 4.75         |
| rs13022216      | G             | A                  | 0.475                      | -0.055                                     | 0.011          | 3.70E-09 | 1.16E-05 | 4.73         |
| rs11665637<br>4 | G             | T                  | 0.038                      | -0.142                                     | 0.022          | 2.90E-09 | 1.15E-05 | 4.72         |
| rs2811434       | T             | G                  | 0.214                      | 0.066                                      | 0.011          | 4.10E-09 | 1.15E-05 | 4.68         |
| rs318468        | T             | C                  | 0.381                      | -0.055                                     | 0.011          | 4.00E-09 | 1.14E-05 | 4.65         |
| rs75417300      | A             | C                  | 0.185                      | -0.066                                     | 0.011          | 1.40E-08 | 1.13E-05 | 4.62         |
| rs11197048<br>9 | GA            | G                  | 0.193                      | -0.066                                     | 0.011          | 6.70E-09 | 1.12E-05 | 4.59         |
| rs1427297       | C             | T                  | 0.319                      | 0.055                                      | 0.011          | 6.00E-09 | 1.11E-05 | 4.53         |

| SNP         | Effect allele | Alternative allele | Frequency of effect allele | $\beta$ -coefficient with HbA1c (mmol/mol) |                |          | R2       | F-statistics |
|-------------|---------------|--------------------|----------------------------|--------------------------------------------|----------------|----------|----------|--------------|
|             |               |                    |                            | $\beta$ -coefficient                       | Standard error | P-value  |          |              |
| rs1047891   | C             | A                  | 0.316                      | 0.055                                      | 0.011          | 6.10E-09 | 1.11E-05 | 4.52         |
| rs1412837   | G             | A                  | 0.242                      | -0.055                                     | 0.011          | 1.20E-08 | 1.10E-05 | 4.50         |
| rs116986845 | C             | T                  | 0.023                      | -0.175                                     | 0.033          | 6.90E-09 | 1.10E-05 | 4.49         |
| rs367070    | A             | G                  | 0.228                      | -0.066                                     | 0.011          | 8.50E-09 | 1.10E-05 | 4.48         |
| rs148912436 | T             | C                  | 0.012                      | 0.240                                      | 0.044          | 7.80E-09 | 1.09E-05 | 4.47         |
| rs2503699   | T             | C                  | 0.318                      | 0.055                                      | 0.011          | 7.60E-09 | 1.09E-05 | 4.47         |
| rs4135183   | C             | T                  | 0.145                      | 0.077                                      | 0.011          | 1.10E-08 | 1.08E-05 | 4.41         |
| rs34952318  | G             | A                  | 0.049                      | 0.120                                      | 0.022          | 1.60E-08 | 1.07E-05 | 4.39         |
| rs73114873  | T             | C                  | 0.120                      | -0.077                                     | 0.011          | 1.00E-08 | 1.07E-05 | 4.38         |
| rs927984    | T             | C                  | 0.153                      | 0.066                                      | 0.011          | 1.10E-08 | 1.07E-05 | 4.36         |
| rs7787060   | T             | C                  | 0.307                      | -0.055                                     | 0.011          | 1.90E-08 | 1.06E-05 | 4.35         |
| rs1490384   | C             | T                  | 0.497                      | -0.055                                     | 0.011          | 1.40E-08 | 1.06E-05 | 4.32         |
| rs12522289  | A             | G                  | 0.081                      | -0.087                                     | 0.022          | 2.10E-08 | 1.06E-05 | 4.32         |
| rs2771425   | A             | G                  | 0.384                      | 0.055                                      | 0.011          | 1.70E-08 | 1.05E-05 | 4.29         |
| rs6054427   | G             | A                  | 0.379                      | 0.055                                      | 0.011          | 1.80E-08 | 1.04E-05 | 4.27         |
| rs75503064  | G             | A                  | 0.079                      | 0.087                                      | 0.022          | 2.10E-08 | 1.04E-05 | 4.26         |
| rs13007705  | C             | T                  | 0.443                      | 0.055                                      | 0.011          | 2.10E-08 | 1.04E-05 | 4.24         |
| rs145818374 | C             | T                  | 0.024                      | 0.164                                      | 0.033          | 3.30E-08 | 1.03E-05 | 4.20         |
| rs941405    | C             | G                  | 0.363                      | -0.055                                     | 0.011          | 2.50E-08 | 1.02E-05 | 4.19         |
| rs77542162  | A             | G                  | 0.023                      | 0.164                                      | 0.033          | 2.30E-08 | 1.02E-05 | 4.19         |
| rs6452790   | G             | A                  | 0.227                      | 0.055                                      | 0.011          | 2.60E-08 | 1.02E-05 | 4.19         |
| rs3742321   | T             | C                  | 0.226                      | 0.055                                      | 0.011          | 2.50E-08 | 1.02E-05 | 4.18         |
| rs1968956   | G             | T                  | 0.041                      | 0.120                                      | 0.022          | 2.30E-08 | 1.02E-05 | 4.18         |
| rs4759319   | G             | T                  | 0.368                      | 0.055                                      | 0.011          | 2.50E-08 | 1.02E-05 | 4.17         |
| rs11387142  | C             | CT                 | 0.216                      | 0.055                                      | 0.011          | 3.50E-08 | 1.02E-05 | 4.16         |
| rs9836493   | T             | C                  | 0.351                      | -0.055                                     | 0.011          | 2.60E-08 | 1.02E-05 | 4.16         |
| rs17138703  | A             | G                  | 0.213                      | 0.055                                      | 0.011          | 2.80E-08 | 1.01E-05 | 4.13         |
| rs72801470  | G             | C                  | 0.256                      | 0.055                                      | 0.011          | 3.20E-08 | 1.01E-05 | 4.12         |

| SNP         | Effect allele | Alternative allele | Frequency of effect allele | $\beta$ -coefficient with HbA1c (mmol/mol) |                |          | R2       | F-statistics |
|-------------|---------------|--------------------|----------------------------|--------------------------------------------|----------------|----------|----------|--------------|
|             |               |                    |                            | $\beta$ -coefficient                       | Standard error | P-value  |          |              |
| rs4654386   | T             | C                  | 0.199                      | -0.066                                     | 0.011          | 3.30E-08 | 1.00E-05 | 4.10         |
| rs6084653   | C             | G                  | 0.391                      | 0.055                                      | 0.011          | 3.70E-08 | 1.00E-05 | 4.09         |
| rs139727420 | C             | CAT                | 0.378                      | -0.055                                     | 0.011          | 3.20E-08 | 1.00E-05 | 4.09         |
| rs7952868   | A             | G                  | 0.246                      | -0.055                                     | 0.011          | 3.90E-08 | 9.91E-06 | 4.05         |
| rs17305657  | T             | C                  | 0.103                      | 0.077                                      | 0.011          | 3.80E-08 | 9.90E-06 | 4.05         |
| rs58950470  | G             | T                  | 0.352                      | -0.055                                     | 0.011          | 4.10E-08 | 9.86E-06 | 4.03         |
| rs11616188  | G             | A                  | 0.426                      | 0.044                                      | 0.011          | 4.30E-08 | 9.84E-06 | 4.02         |
| rs12208868  | C             | T                  | 0.048                      | -0.109                                     | 0.022          | 4.90E-08 | 9.84E-06 | 4.02         |
| rs2959356   | A             | G                  | 0.298                      | -0.055                                     | 0.011          | 4.50E-08 | 9.81E-06 | 4.01         |
| rs4809330   | A             | G                  | 0.334                      | -0.055                                     | 0.011          | 4.80E-08 | 9.72E-06 | 3.98         |
